# Supplementary material for: Development of a novel in vitro insulin resistance model in primary human tenocytes for diabetic tendinopathy research
Source: PeerJ journal article supplement (doi:10.7717/peerj.8740), 2020-06-08
Supplement: Figure_10_raw.zip [file Figure_10_raw.zip]

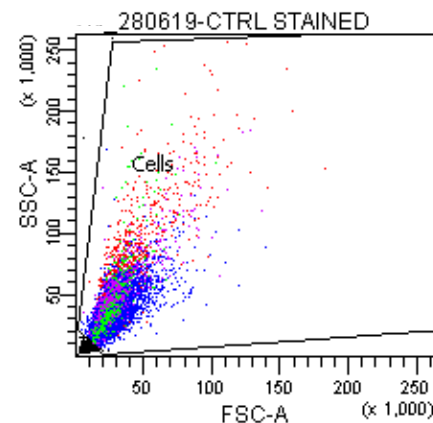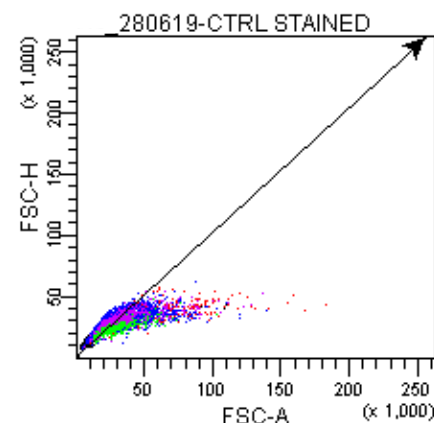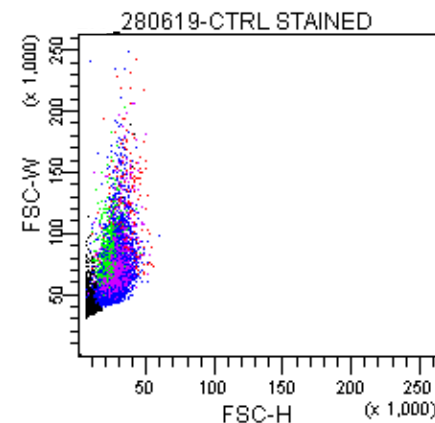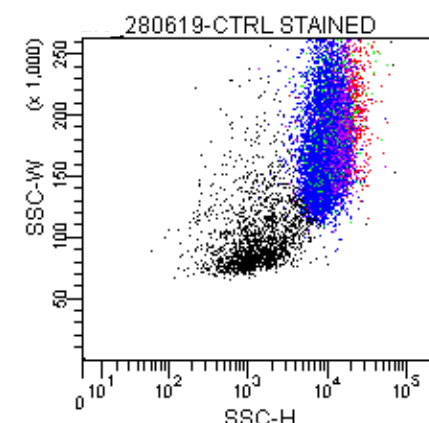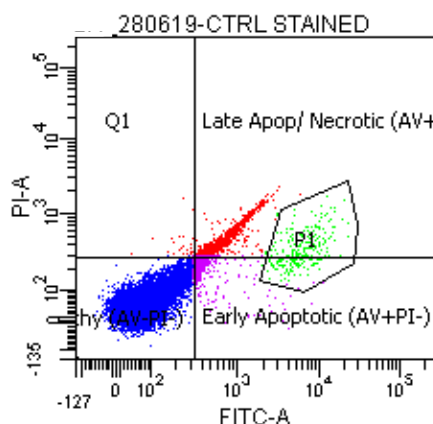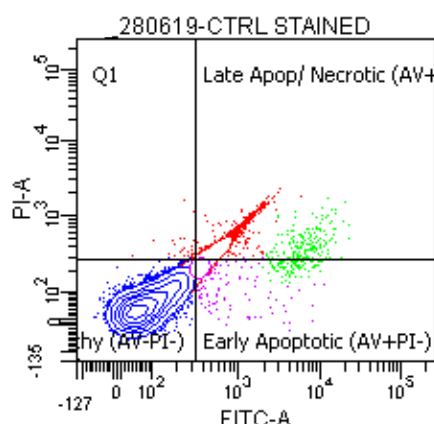

Tube: CTRL STAINED

| Population                   | #Events | %Parent | %Total |
|------------------------------|---------|---------|--------|
| All Events                   | 11,994  | ###     | 100.0  |
| Cells                        | 10,000  | 83.4    | 83.4   |
| Q1                           | 23      | 0.2     | 0.2    |
| Late Apop/ Necrotic (AV+PI+) | 939     | 9.4     | 7.8    |
| Healthy (AV-PI-)             | 8,339   | 83.4    | 69.5   |
| Early Apoptotic (AV+PI-)     | 699     | 7.0     | 5.8    |
| P1                           | 268     | 2.7     | 2.2    |

Experiment Name: Apoptosis Assay  
 Specimen Name: 280619  
 Tube Name: CTRL STAINED  
 Record Date: Jun 28, 2019 12:16:48 PM  
 \$OP: User

| Population                   | #Events | %Parent | FITC-A<br>Median | FITC-A<br>rSD | PI-A<br>Median | PI-A<br>rSD |
|------------------------------|---------|---------|------------------|---------------|----------------|-------------|
| All Events                   | 11,994  | ###     | 82               | 92            | 51             | 63          |
| Cells                        | 10,000  | 83.4    | 99               | 92            | 64             | 66          |
| Q1                           | 23      | 0.2     | 250              | 69            | 344            | 80          |
| Late Apop/ Necrotic (AV+PI+) | 939     | 9.4     | 783              | 406           | 417            | 149         |
| Healthy (AV-PI-)             | 8,339   | 83.4    | 81               | 66            | 52             | 49          |
| Early Apoptotic (AV+PI-)     | 699     | 7.0     | 414              | 101           | 221            | 53          |
| P1                           | 268     | 2.7     | 5,765            | 2,964         | 306            | 125         |
