# Supplementary material for: Development of a novel in vitro insulin resistance model in primary human tenocytes for diabetic tendinopathy research
Source: PeerJ journal article supplement (doi:10.7717/peerj.8740), 2020-06-08
Supplement: Figure_10_raw.zip [file Figure_10_raw.zip]

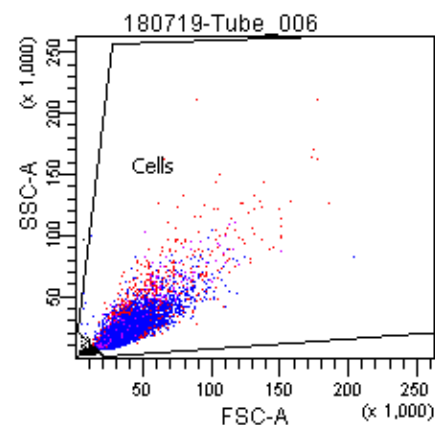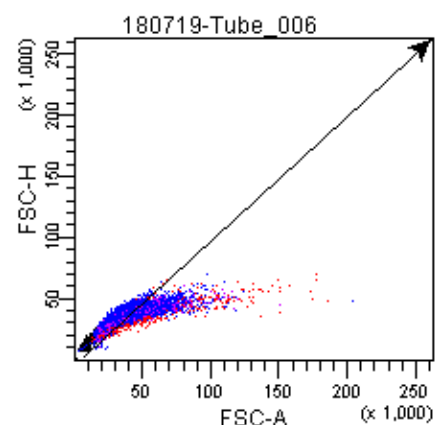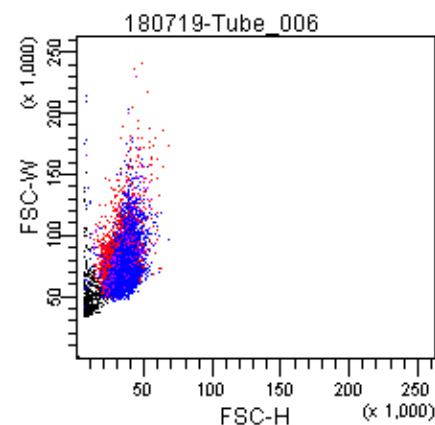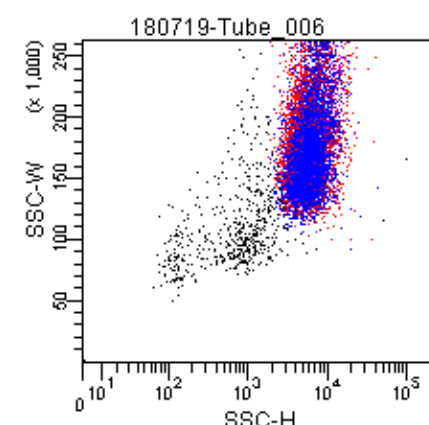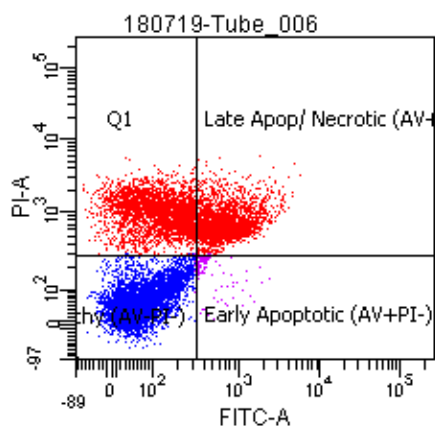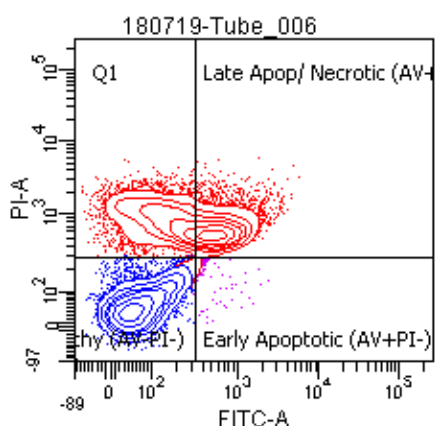

Tube: Tube\_006

| Population                   | #Events | %Parent | %Total |
|------------------------------|---------|---------|--------|
| All Events                   | 10,600  | ###     | 100.0  |
| Cells                        | 10,000  | 94.3    | 94.3   |
| Q1                           | 2,921   | 29.2    | 27.6   |
| Late Apop/ Necrotic (AV+PI+) | 2,793   | 27.9    | 26.3   |
| Healthy (AV-PI-)             | 4,148   | 41.5    | 39.1   |
| Early Apoptotic (AV+PI-)     | 138     | 1.4     | 1.3    |

Experiment Name: Apoptosis Assay  
 Specimen Name: 180719  
 Tube Name: Tube\_006  
 Record Date: Jul 18, 2019 11:20:38 AM  
 \$OP: User

| Population                   | #Events | %Parent | FITC-A<br>Median | FITC-A<br>rSD | PI-A<br>Median | PI-A<br>rSD |
|------------------------------|---------|---------|------------------|---------------|----------------|-------------|
| All Events                   | 10,600  | ###     | 130              | 153           | 444            | 568         |
| Cells                        | 10,000  | 94.3    | 141              | 160           | 480            | 599         |
| Q1                           | 2,921   | 29.2    | 126              | 111           | 929            | 499         |
| Late Apop/ Necrotic (AV+PI+) | 2,793   | 27.9    | 634              | 308           | 620            | 195         |
| Healthy (AV-PI-)             | 4,148   | 41.5    | 67               | 58            | 53             | 50          |
| Early Apoptotic (AV+PI-)     | 138     | 1.4     | 377              | 62            | 199            | 61          |
