# Supplementary material for: Development of a novel in vitro insulin resistance model in primary human tenocytes for diabetic tendinopathy research
Source: PeerJ journal article supplement (doi:10.7717/peerj.8740), 2020-06-08
Supplement: Figure_10_raw.zip [file Figure_10_raw.zip]

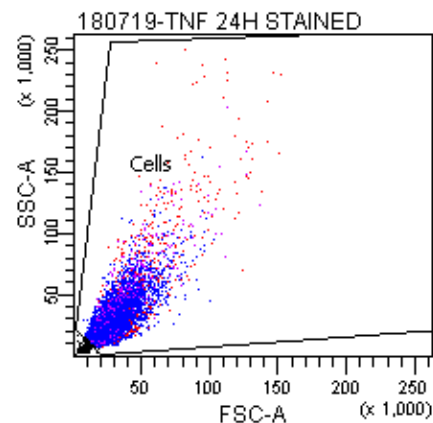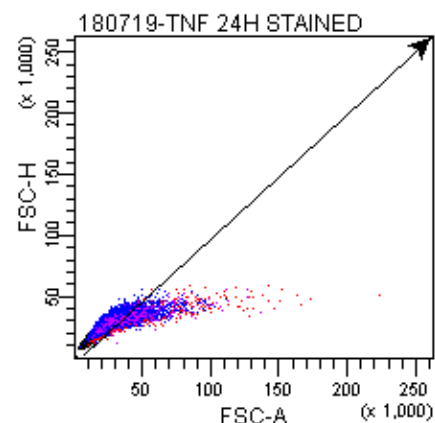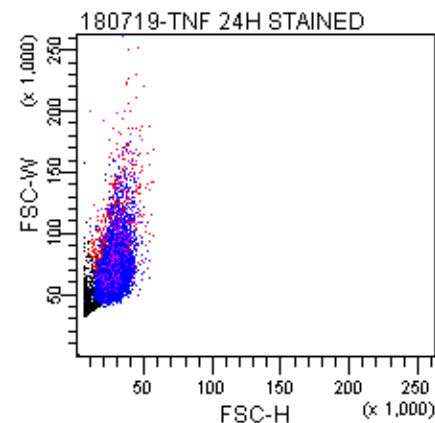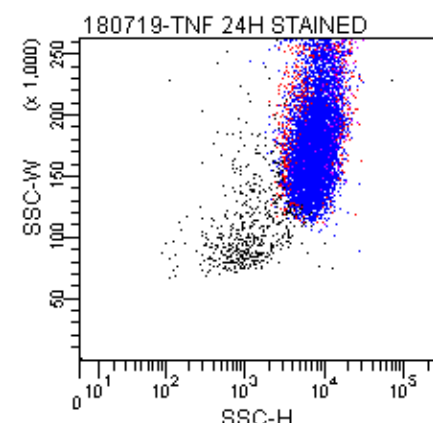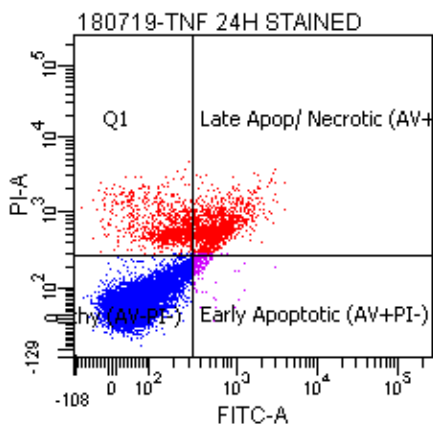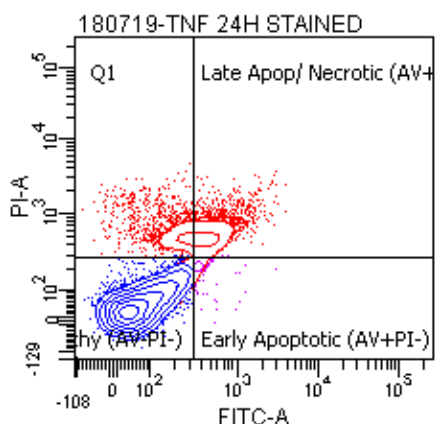

Tube: TNF 24H STAINED

| Population                   | #Events | %Parent | %Total |
|------------------------------|---------|---------|--------|
| All Events                   | 10,659  | ###     | 100.0  |
| Cells                        | 10,000  | 93.8    | 93.8   |
| Q1                           | 938     | 9.4     | 8.8    |
| Late Apop/ Necrotic (AV+PI+) | 1,201   | 12.0    | 11.3   |
| Healthy (AV-PI-)             | 7,639   | 76.4    | 71.7   |
| Early Apoptotic (AV+PI-)     | 222     | 2.2     | 2.1    |

Experiment Name: Apoptosis Assay\_CTRL\_TNF48\_TNF UNST\_TNF 24H  
 Specimen Name: 180719  
 Tube Name: TNF 24H STAINED  
 Record Date: Jul 18, 2019 11:02:59 AM  
 \$OP: User

| Population                   | #Events | %Parent | FITC-A<br>Median | FITC-A<br>rSD | PI-A<br>Median | PI-A<br>rSD |
|------------------------------|---------|---------|------------------|---------------|----------------|-------------|
| All Events                   | 10,659  | ###     | 81               | 86            | 60             | 72          |
| Cells                        | 10,000  | 93.8    | 87               | 90            | 64             | 74          |
| Q1                           | 938     | 9.4     | 188              | 107           | 542            | 190         |
| Late Apop/ Necrotic (AV+PI+) | 1,201   | 12.0    | 559              | 234           | 563            | 207         |
| Healthy (AV-PI-)             | 7,639   | 76.4    | 64               | 58            | 44             | 45          |
| Early Apoptotic (AV+PI-)     | 222     | 2.2     | 378              | 53            | 219            | 49          |
