# Supplementary material for: Development of a novel in vitro insulin resistance model in primary human tenocytes for diabetic tendinopathy research
Source: PeerJ journal article supplement (doi:10.7717/peerj.8740), 2020-06-08
Supplement: Figure_10_raw.zip [file Figure_10_raw.zip]

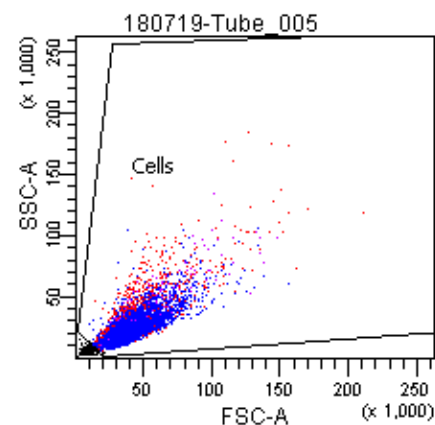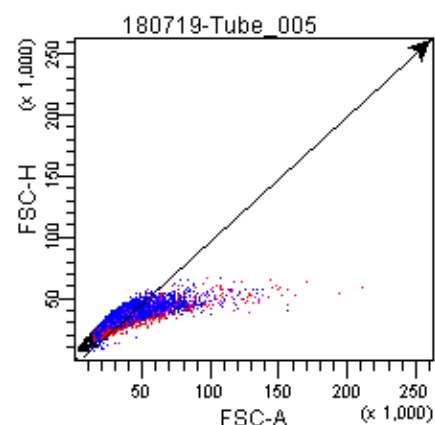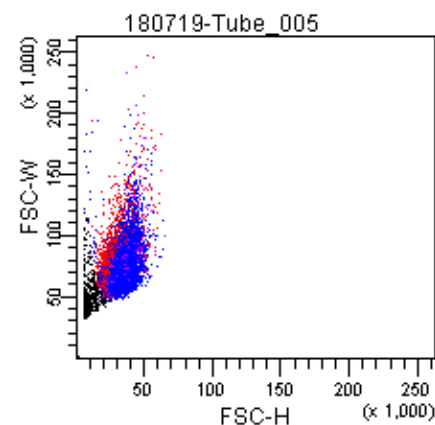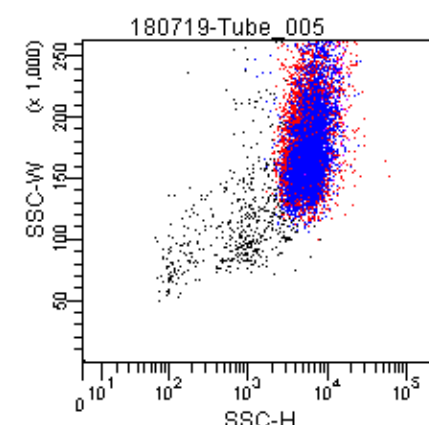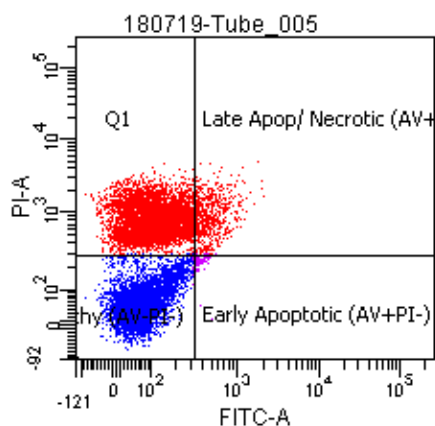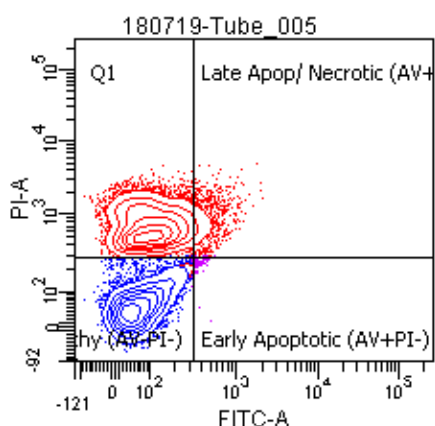

Tube: Tube\_005

| Population                   | #Events | %Parent | %Total |
|------------------------------|---------|---------|--------|
| All Events                   | 10,588  | ###     | 100.0  |
| Cells                        | 10,000  | 94.4    | 94.4   |
| Q1                           | 5,062   | 50.6    | 47.8   |
| Late Apop/ Necrotic (AV+PI+) | 675     | 6.8     | 6.4    |
| Healthy (AV-PI-)             | 4,182   | 41.8    | 39.5   |
| Early Apoptotic (AV+PI-)     | 81      | 0.8     | 0.8    |

Experiment Name: Apoptosis Assay  
 Specimen Name: 180719  
 Tube Name: Tube\_005  
 Record Date: Jul 18, 2019 11:21:50 AM  
 \$OP: User

| Population                   | #Events | %Parent | FITC-A<br>Median | FITC-A<br>rSD | PI-A<br>Median | PI-A<br>rSD |
|------------------------------|---------|---------|------------------|---------------|----------------|-------------|
| All Events                   | 10,588  | ###     | 84               | 81            | 407            | 515         |
| Cells                        | 10,000  | 94.4    | 89               | 81            | 437            | 540         |
| Q1                           | 5,062   | 50.6    | 99               | 81            | 671            | 326         |
| Late Apop/ Necrotic (AV+PI+) | 675     | 6.8     | 447              | 135           | 809            | 426         |
| Healthy (AV-PI-)             | 4,182   | 41.8    | 65               | 57            | 54             | 49          |
| Early Apoptotic (AV+PI-)     | 81      | 0.8     | 359              | 46            | 229            | 34          |
