# Supplementary material for: Development of a novel in vitro insulin resistance model in primary human tenocytes for diabetic tendinopathy research
Source: PeerJ journal article supplement (doi:10.7717/peerj.8740), 2020-06-08
Supplement: Figure_10_raw.zip [file Figure_10_raw.zip]

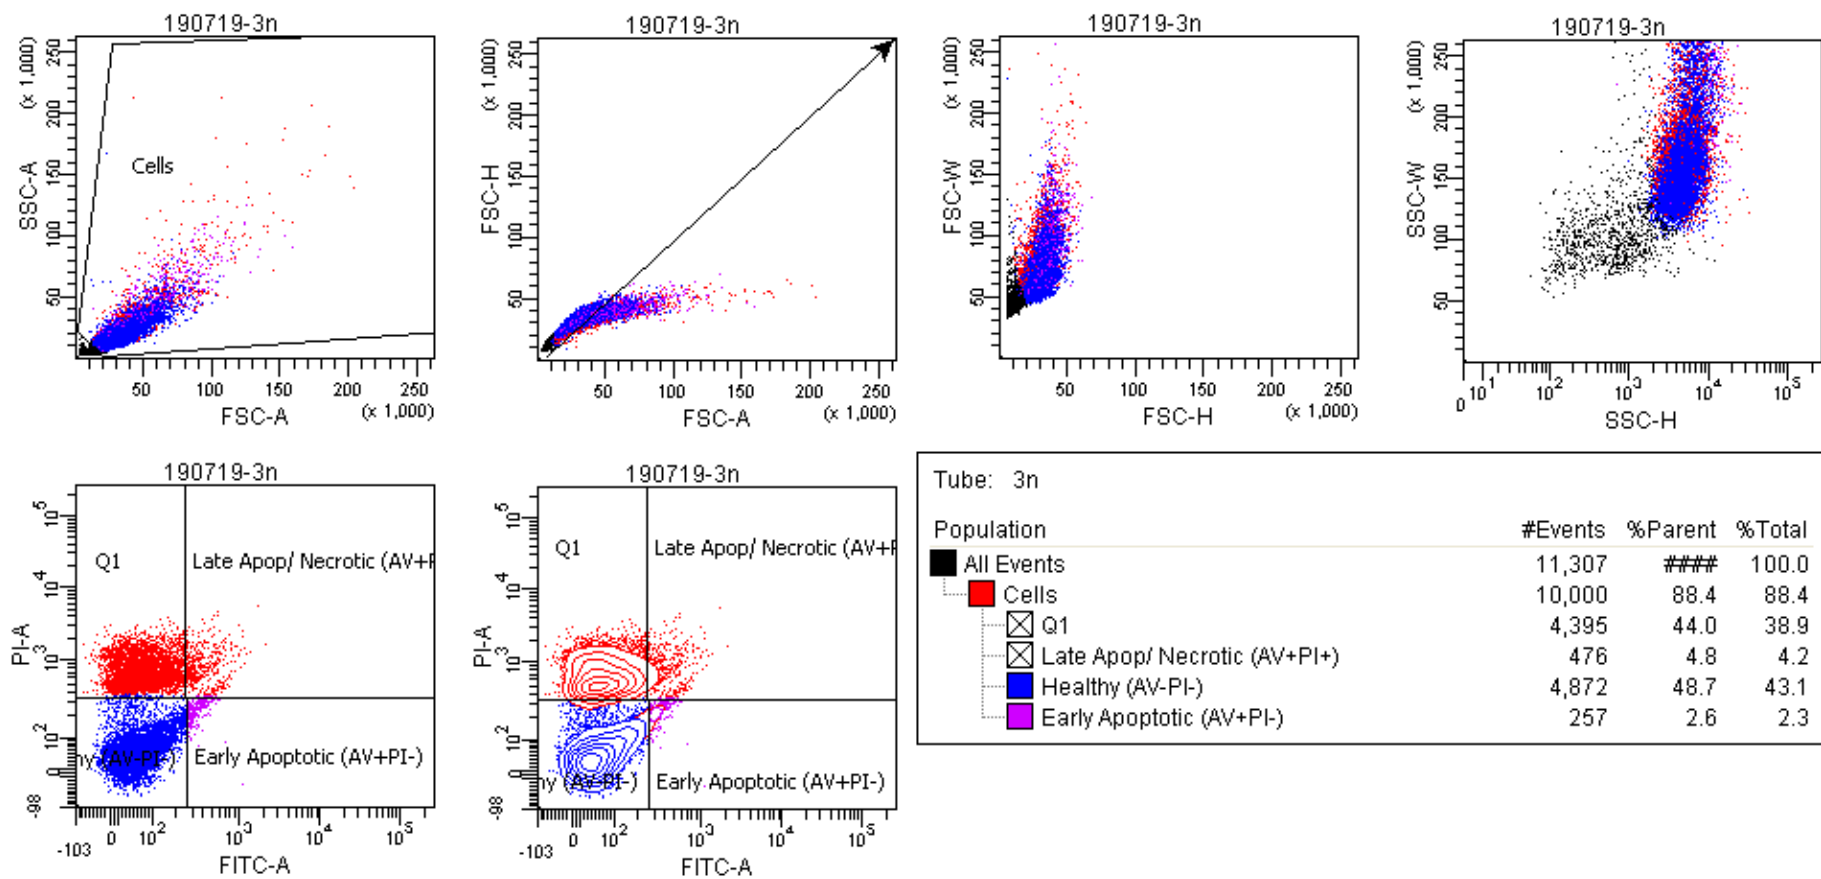

Experiment Name: Apoptosis Assay  
 Specimen Name: 190719  
 Tube Name: 3n  
 Record Date: Jul 19, 2019 1:21:36 PM  
 \$OP: User

| Population                   | #Events | %Parent | FITC-A<br>Median | FITC-A<br>rSD | PI-A<br>Median | PI-A<br>rSD |
|------------------------------|---------|---------|------------------|---------------|----------------|-------------|
| All Events                   | 11,307  | ###     | 56               | 61            | 189            | 285         |
| Cells                        | 10,000  | 88.4    | 65               | 62            | 290            | 375         |
| Q1                           | 4,395   | 44.0    | 67               | 61            | 611            | 239         |
| Late Apop/ Necrotic (AV+PI+) | 476     | 4.8     | 355              | 127           | 767            | 355         |
| Healthy (AV-PI-)             | 4,872   | 48.7    | 53               | 49            | 50             | 50          |
| Early Apoptotic (AV+PI-)     | 257     | 2.6     | 325              | 70            | 230            | 63          |
