# Supplementary material for: Development of a novel in vitro insulin resistance model in primary human tenocytes for diabetic tendinopathy research
Source: PeerJ journal article supplement (doi:10.7717/peerj.8740), 2020-06-08
Supplement: Figure_10_raw.zip [file Figure_10_raw.zip]

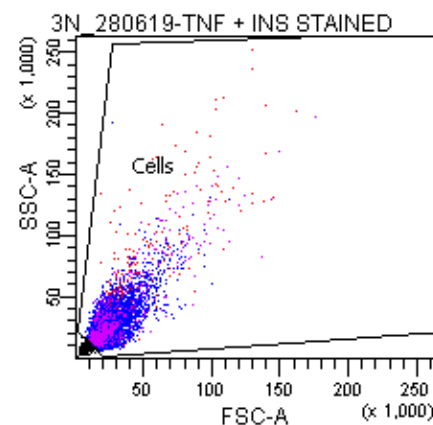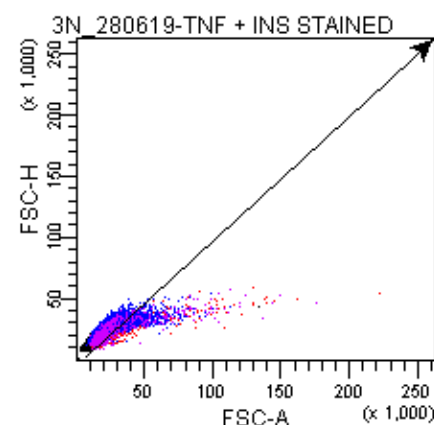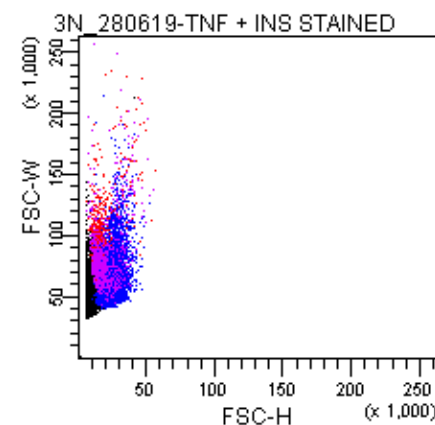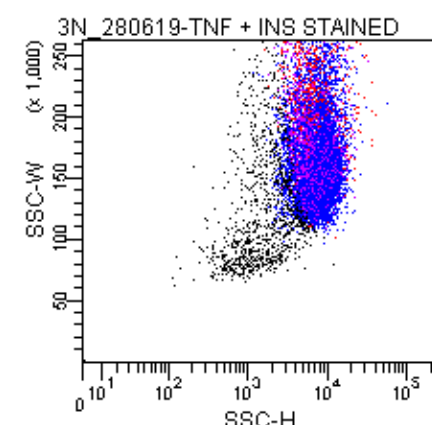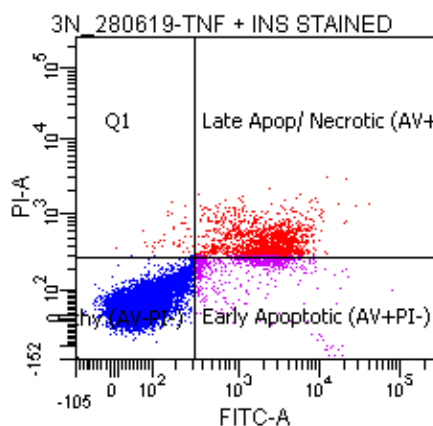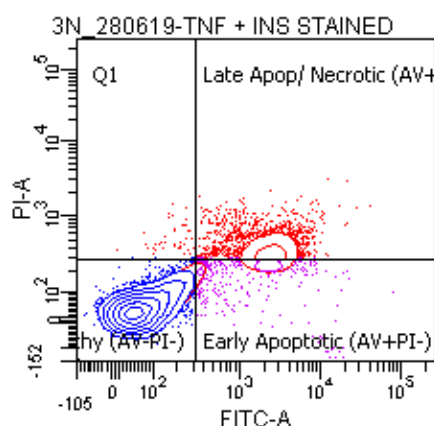

Tube: TNF + INS STAINED

| Population                   | #Events | %Parent | %Total |
|------------------------------|---------|---------|--------|
| All Events                   | 11,482  | ###     | 100.0  |
| Cells                        | 10,000  | 87.1    | 87.1   |
| Q1                           | 40      | 0.4     | 0.3    |
| Late Apop/ Necrotic (AV+PI+) | 1,572   | 15.7    | 13.7   |
| Healthy (AV-PI-)             | 7,670   | 76.7    | 66.8   |
| Early Apoptotic (AV+PI-)     | 718     | 7.2     | 6.3    |

Experiment Name: Apoptosis Assay\_3N\_280620\_R1

Specimen Name: 3N\_280619

Tube Name: TNF + INS STAINED

Record Date: Jun 28, 2019 12:31:51 PM

\$OP: User

| Population                   | #Events | %Parent | FITC-A<br>Median | FITC-A<br>rSD | PI-A<br>Median | PI-A<br>rSD |
|------------------------------|---------|---------|------------------|---------------|----------------|-------------|
| All Events                   | 11,482  | ###     | 83               | 91            | 49             | 63          |
| Cells                        | 10,000  | 87.1    | 86               | 86            | 52             | 62          |
| Q1                           | 40      | 0.4     | 188              | 88            | 431            | 115         |
| Late Apop/ Necrotic (AV+PI+) | 1,572   | 15.7    | 2,388            | 1,633         | 406            | 130         |
| Healthy (AV-PI-)             | 7,670   | 76.7    | 64               | 51            | 37             | 39          |
| Early Apoptotic (AV+PI-)     | 718     | 7.2     | 1,666            | 1,828         | 231            | 50          |
