# Supplementary material for: Development of a novel in vitro insulin resistance model in primary human tenocytes for diabetic tendinopathy research
Source: PeerJ journal article supplement (doi:10.7717/peerj.8740), 2020-06-08
Supplement: Figure_10_raw.zip [file Figure_10_raw.zip]

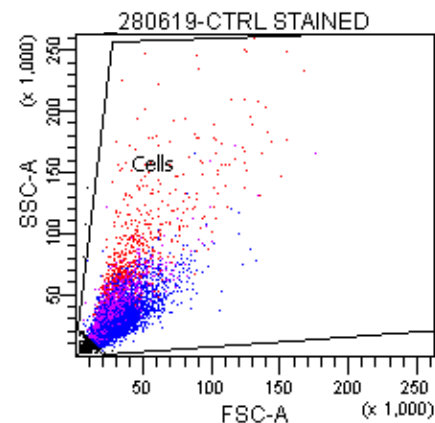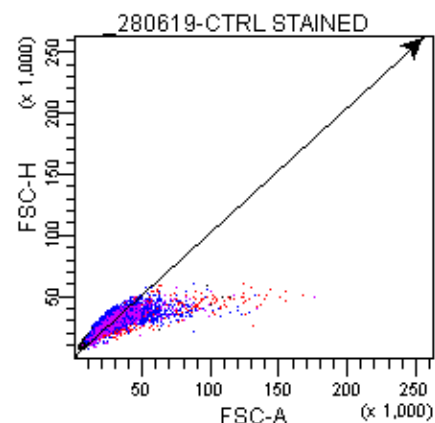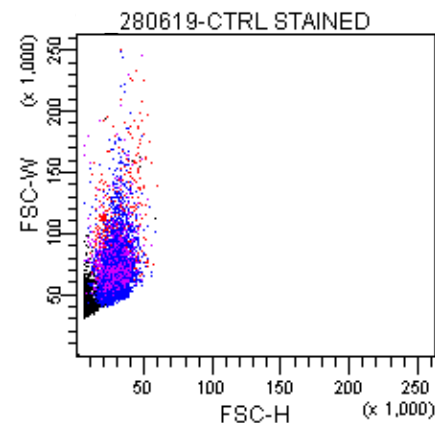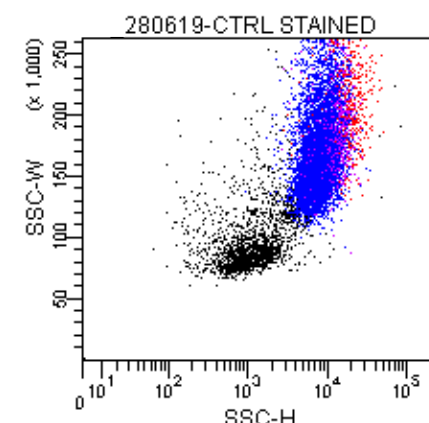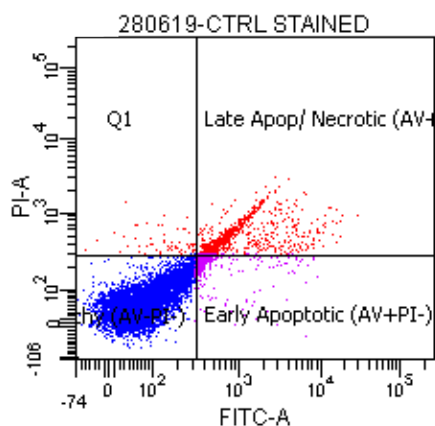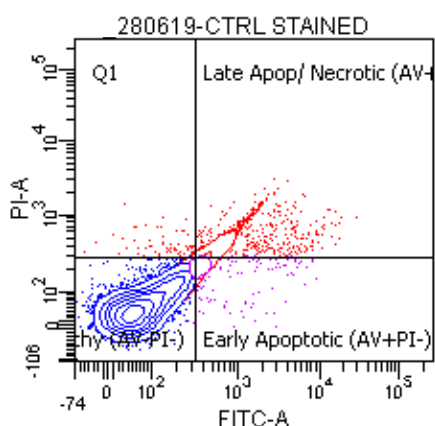

Tube: CTRL STAINED

| Population                   | #Events | %Parent | %Total |
|------------------------------|---------|---------|--------|
| All Events                   | 9,165   | ###     | 100.0  |
| Cells                        | 7,404   | 80.8    | 80.8   |
| Q1                           | 60      | 0.8     | 0.7    |
| Late Apop/ Necrotic (AV+PI+) | 755     | 10.2    | 8.2    |
| Healthy (AV-PI-)             | 6,175   | 83.4    | 67.4   |
| Early Apoptotic (AV+PI-)     | 414     | 5.6     | 4.5    |

Experiment Name: Apoptosis Assay  
 Specimen Name: 280619  
 Tube Name: CTRL STAINED  
 Record Date: Jun 28, 2019 1:52:47 PM  
 \$OP: User

| Population                   | #Events | %Parent | FITC-A<br>Median | FITC-A<br>rSD | PI-A<br>Median | PI-A<br>rSD |
|------------------------------|---------|---------|------------------|---------------|----------------|-------------|
| All Events                   | 9,165   | ###     | 67               | 80            | 45             | 60          |
| Cells                        | 7,404   | 80.8    | 87               | 84            | 61             | 66          |
| Q1                           | 60      | 0.8     | 163              | 122           | 353            | 76          |
| Late Apop/ Necrotic (AV+PI+) | 755     | 10.2    | 820              | 502           | 433            | 158         |
| Healthy (AV-PI-)             | 6,175   | 83.4    | 70               | 59            | 49             | 49          |
| Early Apoptotic (AV+PI-)     | 414     | 5.6     | 396              | 84            | 229            | 49          |
