# Supplementary material for: Development of a novel in vitro insulin resistance model in primary human tenocytes for diabetic tendinopathy research
Source: PeerJ journal article supplement (doi:10.7717/peerj.8740), 2020-06-08
Supplement: Figure_10_raw.zip [file Figure_10_raw.zip]

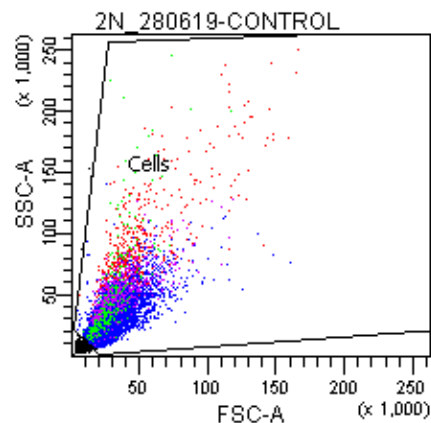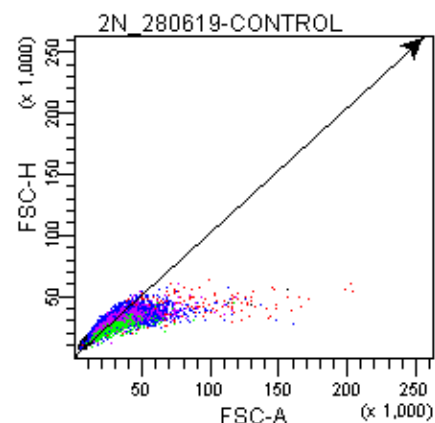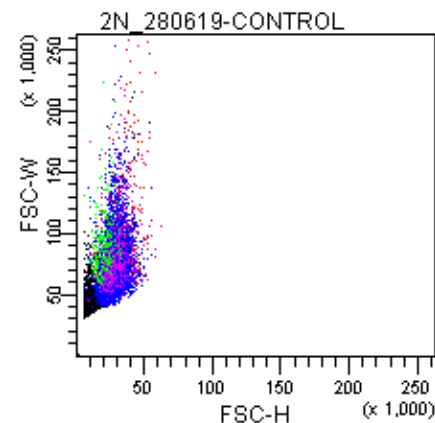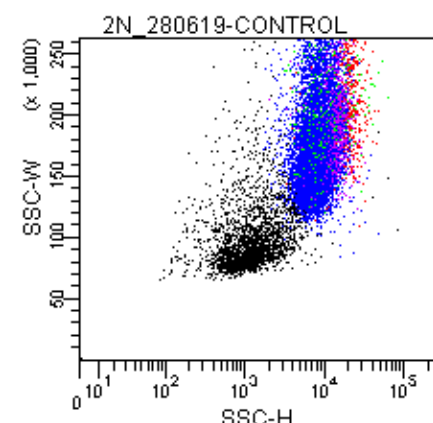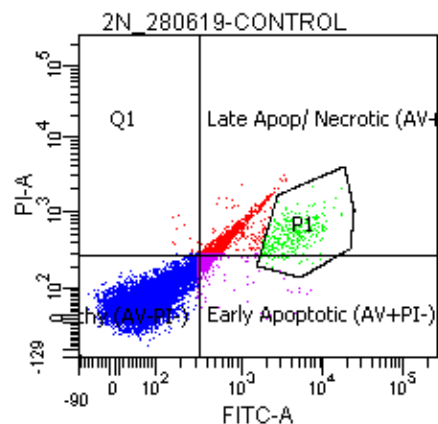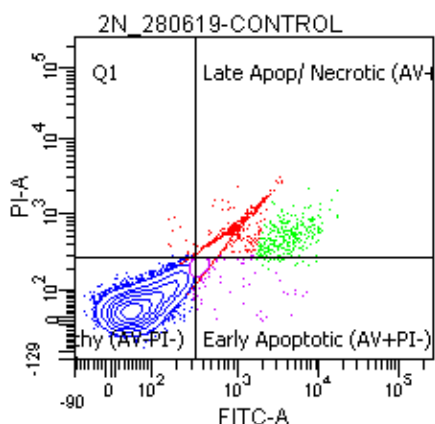

Tube: CONTROL

| Population                   | #Events | %Parent | %Total |
|------------------------------|---------|---------|--------|
| All Events                   | 12,465  | ###     | 100.0  |
| Cells                        | 10,000  | 80.2    | 80.2   |
| Q1                           | 10      | 0.1     | 0.1    |
| Late Apop/ Necrotic (AV+PI+) | 983     | 9.8     | 7.9    |
| Healthy (AV-PI-)             | 8,481   | 84.8    | 68.0   |
| Early Apoptotic (AV+PI-)     | 526     | 5.3     | 4.2    |
| P1                           | 275     | 2.8     | 2.2    |

Experiment Name: Apoptosis Assay  
 Specimen Name: 2N\_280619  
 Tube Name: CONTROL  
 Record Date: Jun 28, 2019 1:06:53 PM  
 \$OP: User

| Population                   | #Events | %Parent | FITC-A<br>Median | FITC-A<br>rSD | PI-A<br>Median | PI-A<br>rSD |
|------------------------------|---------|---------|------------------|---------------|----------------|-------------|
| All Events                   | 12,465  | ###     | 65               | 79            | 43             | 57          |
| Cells                        | 10,000  | 80.2    | 85               | 83            | 59             | 62          |
| Q1                           | 10      | 0.1     | 210              | 63            | 409            | 165         |
| Late Apop/ Necrotic (AV+PI+) | 983     | 9.8     | 914              | 606           | 447            | 171         |
| Healthy (AV-PI-)             | 8,481   | 84.8    | 70               | 61            | 47             | 46          |
| Early Apoptotic (AV+PI-)     | 526     | 5.3     | 388              | 67            | 224            | 49          |
| P1                           | 275     | 2.8     | 4,103            | 2,152         | 458            | 190         |
