# Supplementary material for: Development of a novel in vitro insulin resistance model in primary human tenocytes for diabetic tendinopathy research
Source: PeerJ journal article supplement (doi:10.7717/peerj.8740), 2020-06-08
Supplement: Figure_10_raw.zip [file Figure_10_raw.zip]

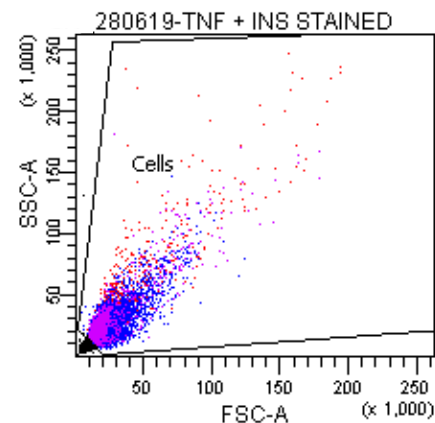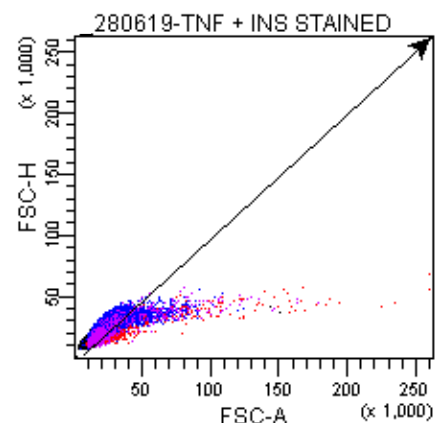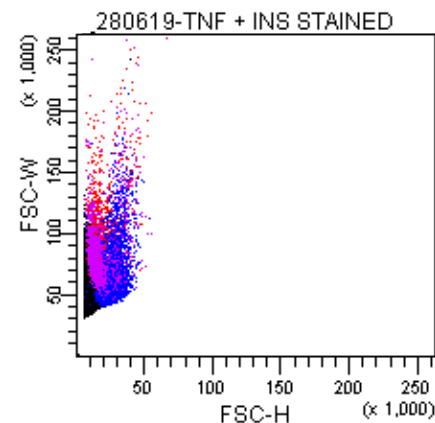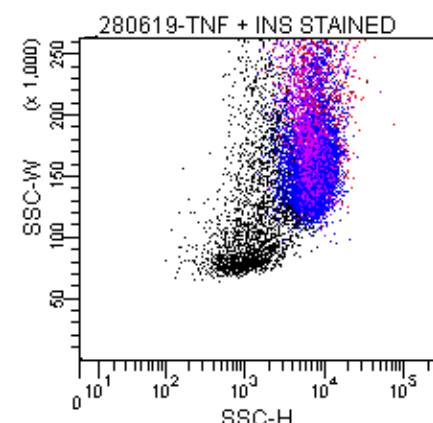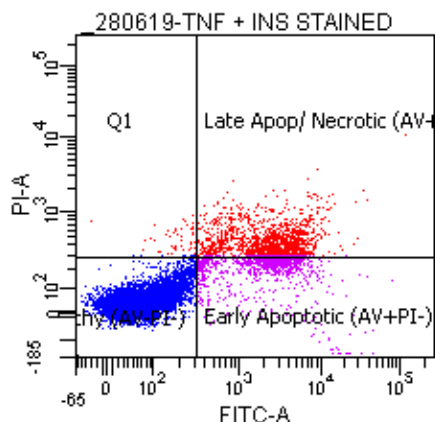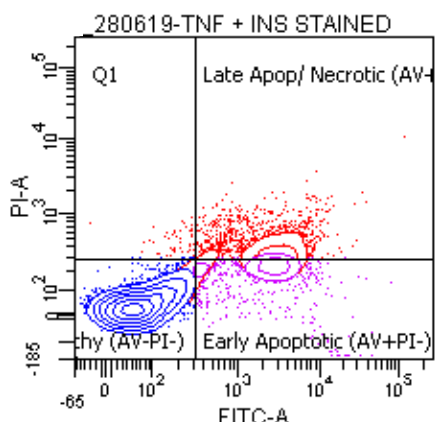

Tube: TNF + INS STAINED

| Population                   | #Events | %Parent | %Total |
|------------------------------|---------|---------|--------|
| All Events                   | 11,609  | ###     | 100.0  |
| Cells                        | 8,954   | 77.1    | 77.1   |
| Q1                           | 47      | 0.5     | 0.4    |
| Late Apop/ Necrotic (AV+PI+) | 1,425   | 15.9    | 12.3   |
| Healthy (AV-PI-)             | 6,263   | 69.9    | 53.9   |
| Early Apoptotic (AV+PI-)     | 1,219   | 13.6    | 10.5   |

Experiment Name: Apoptosis Assay  
 Specimen Name: \_280619  
 Tube Name: TNF + INS STAINED  
 Record Date: Jun 28, 2019 2:24:14 PM  
 \$OP: User

| Population                   | #Events | %Parent | FITC-A<br>Median | FITC-A<br>rSD | PI-A<br>Median | PI-A<br>rSD |
|------------------------------|---------|---------|------------------|---------------|----------------|-------------|
| All Events                   | 11,609  | ###     | 95               | 122           | 47             | 70          |
| Cells                        | 8,954   | 77.1    | 100              | 109           | 59             | 76          |
| Q1                           | 47      | 0.5     | 212              | 90            | 433            | 156         |
| Late Apop/ Necrotic (AV+PI+) | 1,425   | 15.9    | 2,872            | 2,354         | 394            | 121         |
| Healthy (AV-PI-)             | 6,263   | 69.9    | 65               | 52            | 37             | 40          |
| Early Apoptotic (AV+PI-)     | 1,219   | 13.6    | 2,542            | 2,005         | 223            | 52          |
