# Supplementary material for: Development of a novel in vitro insulin resistance model in primary human tenocytes for diabetic tendinopathy research
Source: PeerJ journal article supplement (doi:10.7717/peerj.8740), 2020-06-08
Supplement: Figure_10_raw.zip [file Figure_10_raw.zip]

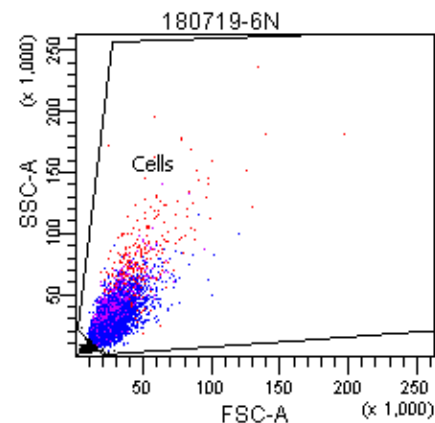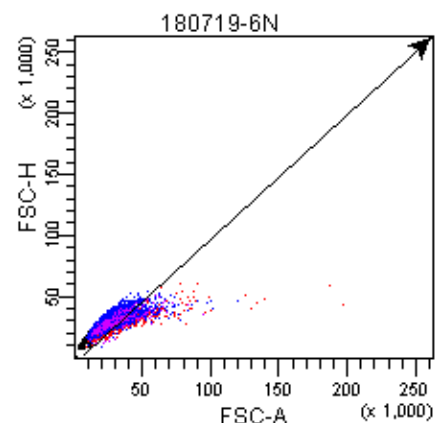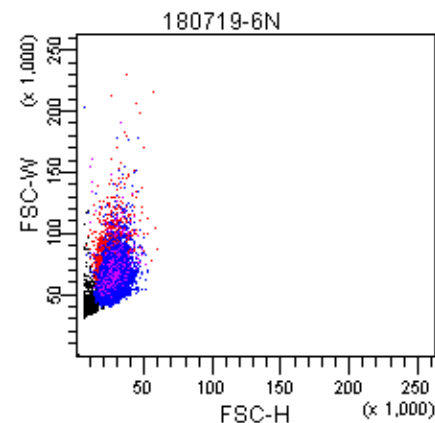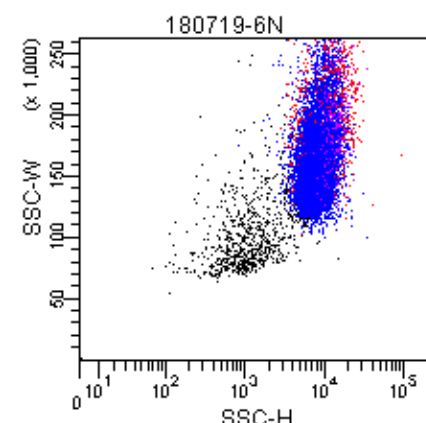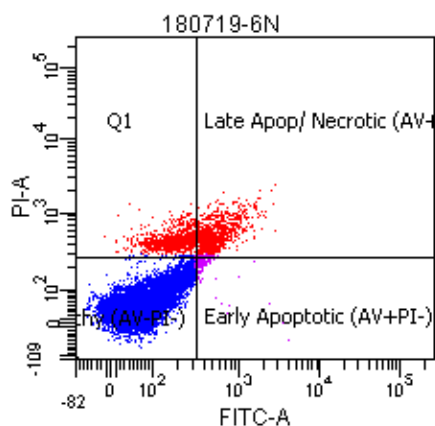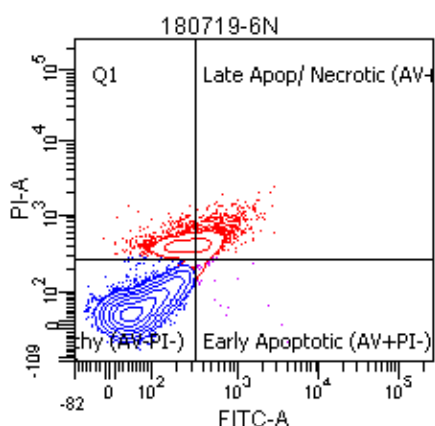

Tube: 6N

| Population                   | #Events | %Parent | %Total |
|------------------------------|---------|---------|--------|
| All Events                   | 10,865  | ###     | 100.0  |
| Cells                        | 10,000  | 92.0    | 92.0   |
| Q1                           | 984     | 9.8     | 9.1    |
| Late Apop/ Necrotic (AV+PI+) | 977     | 9.8     | 9.0    |
| Healthy (AV-PI-)             | 7,812   | 78.1    | 71.9   |
| Early Apoptotic (AV+PI-)     | 227     | 2.3     | 2.1    |

Experiment Name: Apoptosis Assay\_INS  
 Specimen Name: 180719  
 Tube Name: 6N  
 Record Date: Jul 18, 2019 11:31:55 AM  
 \$OP: User

| Population                   | #Events | %Parent | FITC-A<br>Median | FITC-A<br>rSD | PI-A<br>Median | PI-A<br>rSD |
|------------------------------|---------|---------|------------------|---------------|----------------|-------------|
| All Events                   | 10,865  | ###     | 85               | 90            | 60             | 71          |
| Cells                        | 10,000  | 92.0    | 94               | 92            | 67             | 73          |
| Q1                           | 984     | 9.8     | 193              | 82            | 405            | 66          |
| Late Apop/ Necrotic (AV+PI+) | 977     | 9.8     | 508              | 181           | 480            | 143         |
| Healthy (AV-PI-)             | 7,812   | 78.1    | 70               | 63            | 48             | 46          |
| Early Apoptotic (AV+PI-)     | 227     | 2.3     | 370              | 46            | 226            | 39          |
