# Supplementary material for: Development of a novel in vitro insulin resistance model in primary human tenocytes for diabetic tendinopathy research
Source: PeerJ journal article supplement (doi:10.7717/peerj.8740), 2020-06-08
Supplement: Figure_10_raw.zip [file Figure_10_raw.zip]

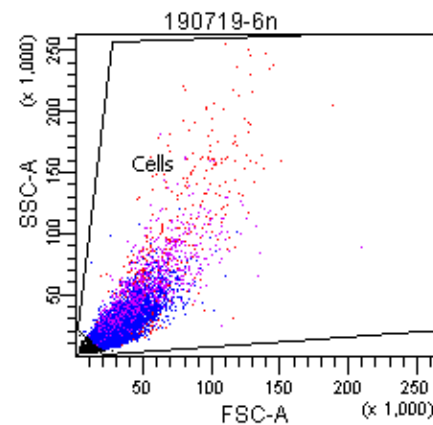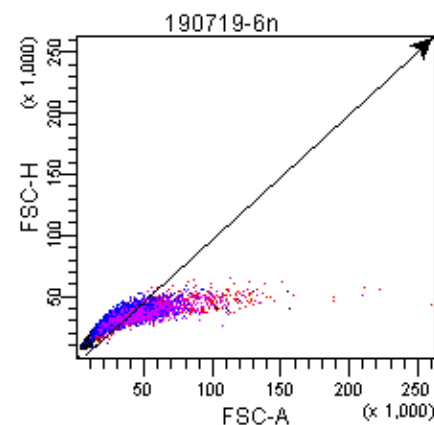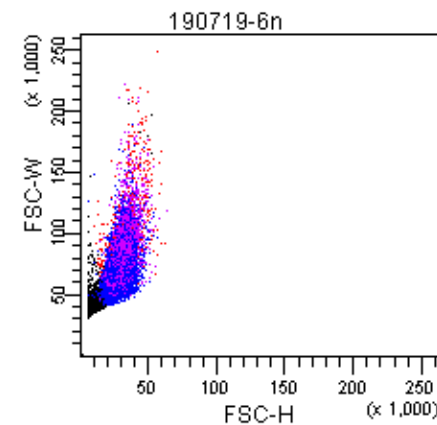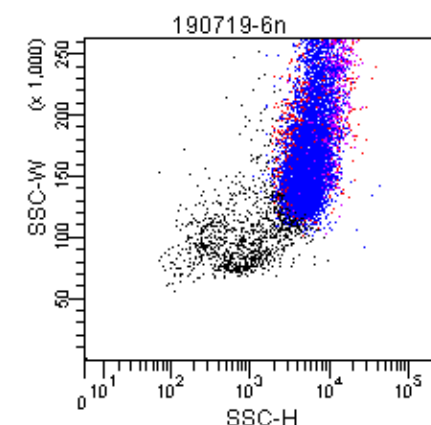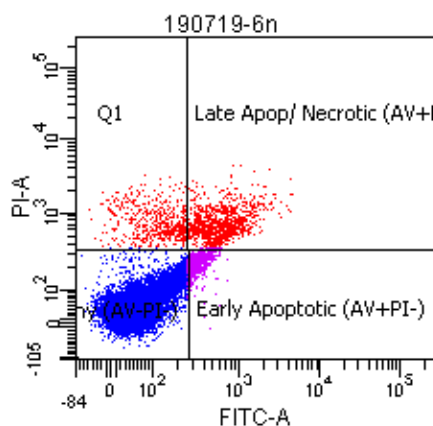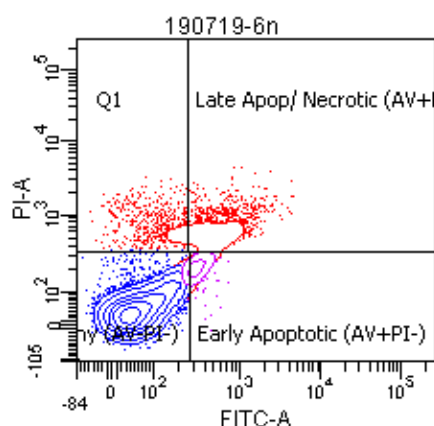

Tube: 6n

| Population                   | #Events | %Parent | %Total |
|------------------------------|---------|---------|--------|
| All Events                   | 11,515  | ###     | 100.0  |
| Cells                        | 10,000  | 86.8    | 86.8   |
| Q1                           | 556     | 5.6     | 4.8    |
| Late Apop/ Necrotic (AV+PI+) | 1,098   | 11.0    | 9.5    |
| Healthy (AV-PI-)             | 7,704   | 77.0    | 66.9   |
| Early Apoptotic (AV+PI-)     | 642     | 6.4     | 5.6    |

Experiment Name: Apoptosis Assay  
 Specimen Name: 190719  
 Tube Name: 6n  
 Record Date: Jul 19, 2019 1:14:59 PM  
 \$OP: User

| Population                   | #Events | %Parent | FITC-A<br>Median | FITC-A<br>rSD | PI-A<br>Median | PI-A<br>rSD |
|------------------------------|---------|---------|------------------|---------------|----------------|-------------|
| All Events                   | 11,515  | ###     | 68               | 77            | 52             | 66          |
| Cells                        | 10,000  | 86.8    | 81               | 84            | 61             | 70          |
| Q1                           | 556     | 5.6     | 130              | 86            | 630            | 239         |
| Late Apop/ Necrotic (AV+PI+) | 1,098   | 11.0    | 576              | 315           | 625            | 205         |
| Healthy (AV-PI-)             | 7,704   | 77.0    | 60               | 54            | 44             | 44          |
| Early Apoptotic (AV+PI-)     | 642     | 6.4     | 342              | 86            | 217            | 65          |
