# Supplementary material for: Development of a novel in vitro insulin resistance model in primary human tenocytes for diabetic tendinopathy research
Source: PeerJ journal article supplement (doi:10.7717/peerj.8740), 2020-06-08
Supplement: Figure_10_raw.zip [file Figure_10_raw.zip]

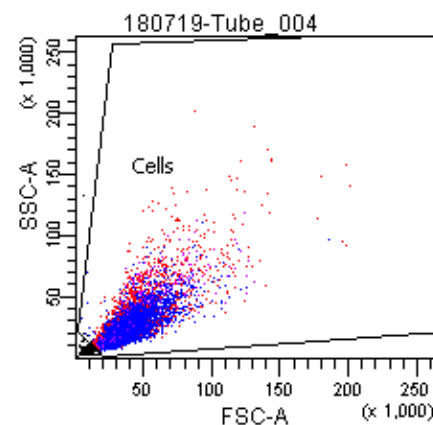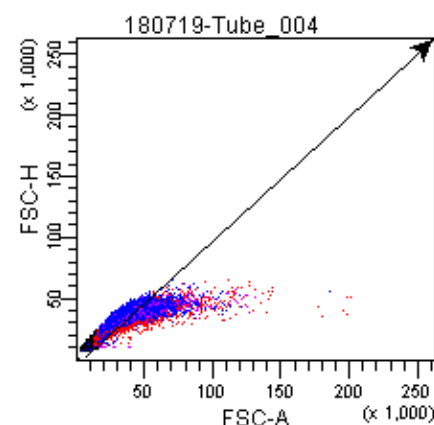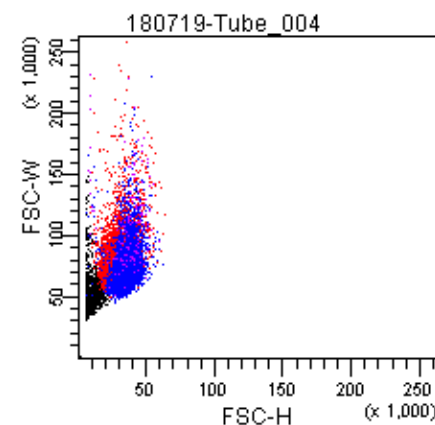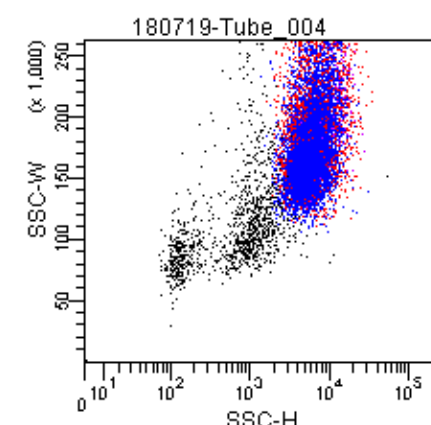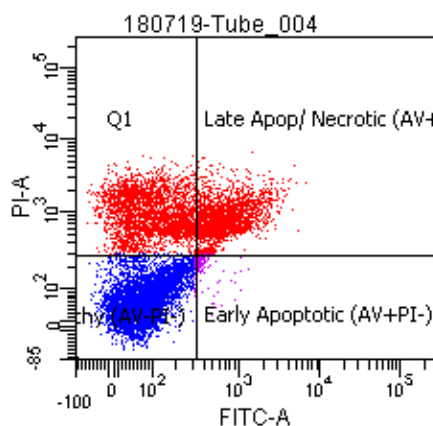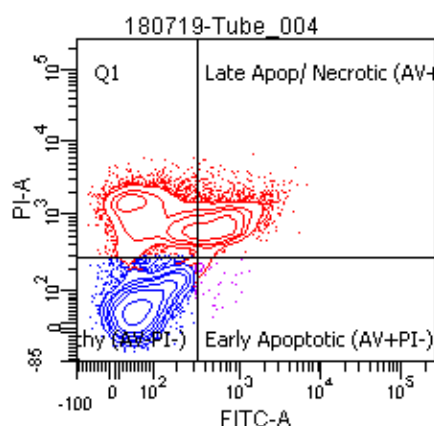

Tube: Tube\_004

| Population                   | #Events | %Parent | %Total |
|------------------------------|---------|---------|--------|
| All Events                   | 11,224  | ###     | 100.0  |
| Cells                        | 10,000  | 89.1    | 89.1   |
| Q1                           | 2,721   | 27.2    | 24.2   |
| Late Apop/ Necrotic (AV+PI+) | 2,137   | 21.4    | 19.0   |
| Healthy (AV-PI-)             | 4,993   | 49.9    | 44.5   |
| Early Apoptotic (AV+PI-)     | 149     | 1.5     | 1.3    |

Experiment Name: Apoptosis Assay  
 Specimen Name: 180719  
 Tube Name: Tube\_004  
 Record Date: Jul 18, 2019 11:14:14 AM  
 \$OP: User

| Population                   | #Events | %Parent | FITC-A<br>Median | FITC-A<br>rSD | PI-A<br>Median | PI-A<br>rSD |
|------------------------------|---------|---------|------------------|---------------|----------------|-------------|
| All Events                   | 11,224  | ###     | 89               | 104           | 150            | 224         |
| Cells                        | 10,000  | 89.1    | 102              | 110           | 231            | 334         |
| Q1                           | 2,721   | 27.2    | 88               | 90            | 912            | 584         |
| Late Apop/ Necrotic (AV+PI+) | 2,137   | 21.4    | 664              | 357           | 759            | 333         |
| Healthy (AV-PI-)             | 4,993   | 49.9    | 68               | 55            | 55             | 53          |
| Early Apoptotic (AV+PI-)     | 149     | 1.5     | 376              | 57            | 212            | 47          |
