# Supplementary material for: Development of a novel in vitro insulin resistance model in primary human tenocytes for diabetic tendinopathy research
Source: PeerJ journal article supplement (doi:10.7717/peerj.8740), 2020-06-08
Supplement: Figure_10_raw.zip [file Figure_10_raw.zip]

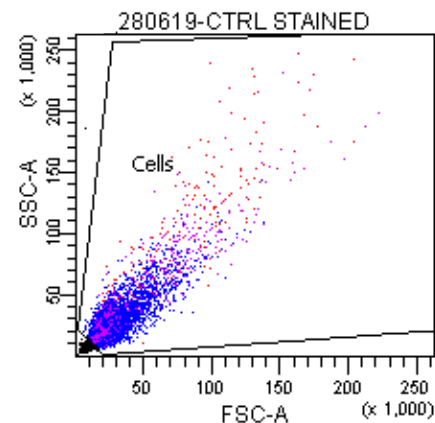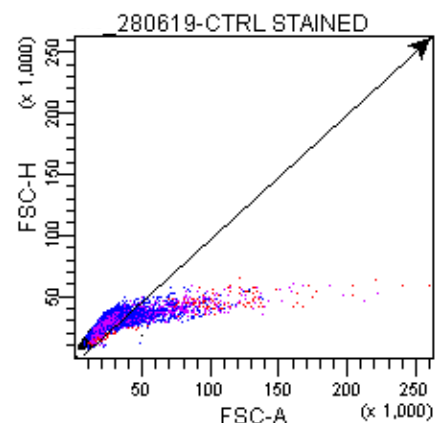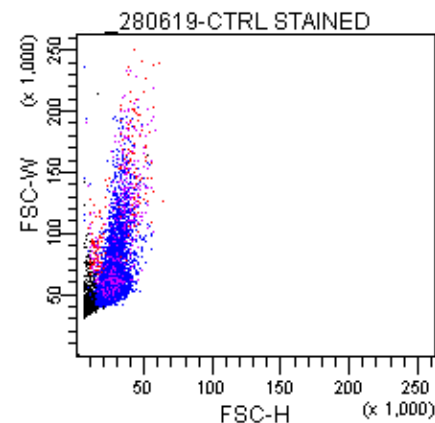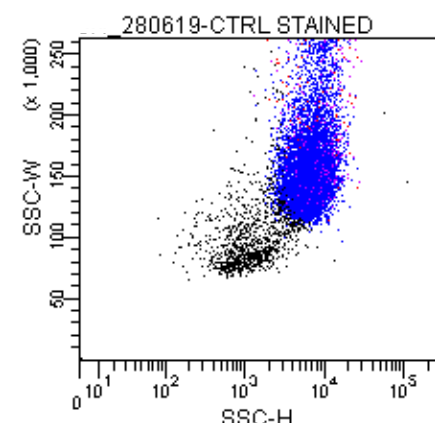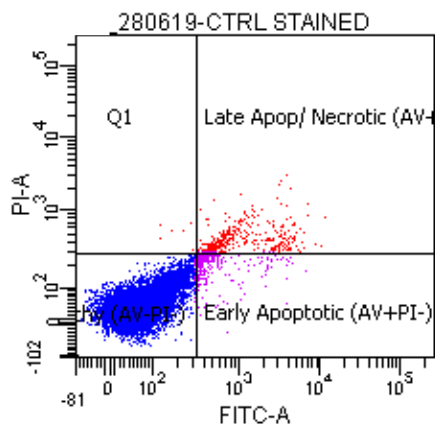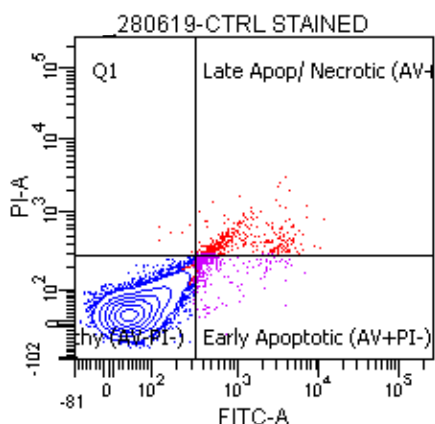

Tube: CTRL STAINED

| Population                   | #Events | %Parent | %Total |
|------------------------------|---------|---------|--------|
| All Events                   | 11,673  | ###     | 100.0  |
| Cells                        | 10,000  | 85.7    | 85.7   |
| Q1                           | 7       | 0.1     | 0.1    |
| Late Apop/ Necrotic (AV+PI+) | 319     | 3.2     | 2.7    |
| Healthy (AV-PI-)             | 9,321   | 93.2    | 79.9   |
| Early Apoptotic (AV+PI-)     | 353     | 3.5     | 3.0    |

Experiment Name: Apoptosis Assay  
 Specimen Name: 280619  
 Tube Name: CTRL STAINED  
 Record Date: Jun 28, 2019 2:29:48 PM  
 \$OP: User

| Population                   | #Events | %Parent | FITC-A<br>Median | FITC-A<br>rSD | PI-A<br>Median | PI-A<br>rSD |
|------------------------------|---------|---------|------------------|---------------|----------------|-------------|
| All Events                   | 11,673  | ###     | 54               | 53            | 32             | 40          |
| Cells                        | 10,000  | 85.7    | 62               | 54            | 37             | 40          |
| Q1                           | 7       | 0.1     | 173              | 72            | 523            | 134         |
| Late Apop/ Necrotic (AV+PI+) | 319     | 3.2     | 906              | 618           | 386            | 111         |
| Healthy (AV-PI-)             | 9,321   | 93.2    | 57               | 48            | 34             | 36          |
| Early Apoptotic (AV+PI-)     | 353     | 3.5     | 430              | 119           | 212            | 60          |
