# Supplementary material for: Development of a novel in vitro insulin resistance model in primary human tenocytes for diabetic tendinopathy research
Source: PeerJ journal article supplement (doi:10.7717/peerj.8740), 2020-06-08
Supplement: Figure_10_raw.zip [file Figure_10_raw.zip]

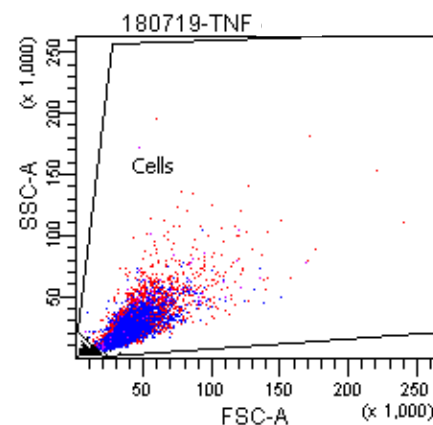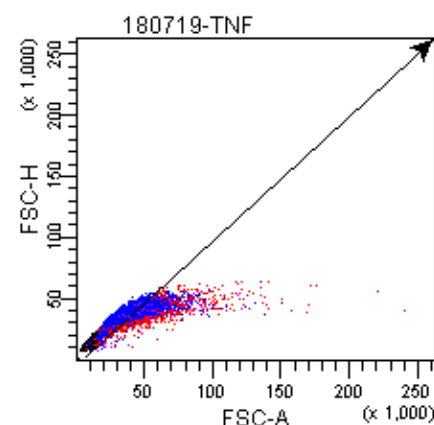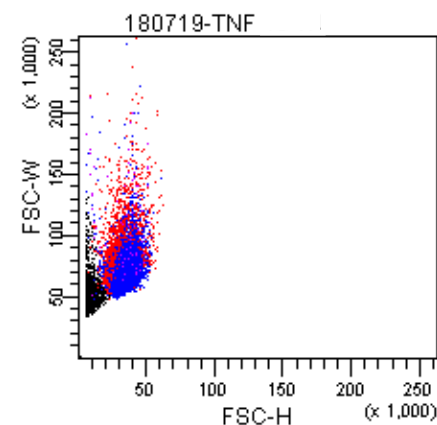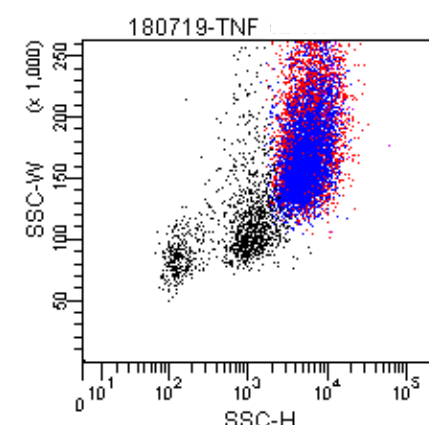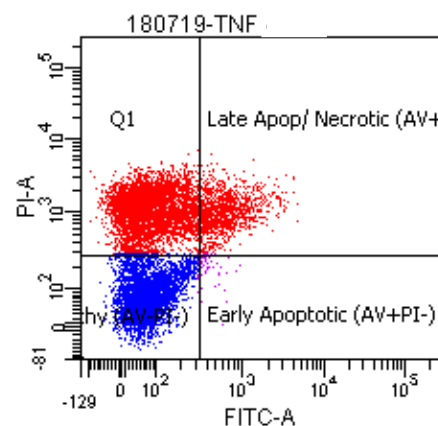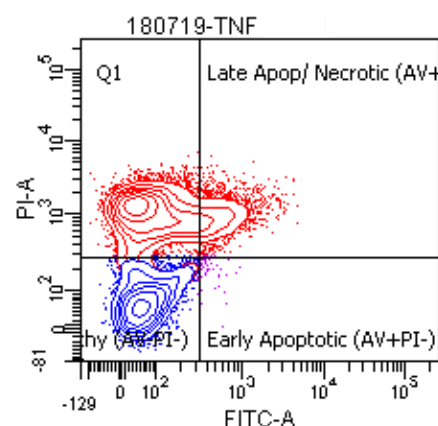

Tube: TNF 48 1N

| Population                   | #Events | %Parent | %Total |
|------------------------------|---------|---------|--------|
| All Events                   | 11,376  | ###     | 100.0  |
| Cells                        | 10,000  | 87.9    | 87.9   |
| Q1                           | 4,795   | 47.9    | 42.2   |
| Late Apop/ Necrotic (AV+PI+) | 1,359   | 13.6    | 11.9   |
| Healthy (AV-PI-)             | 3,774   | 37.7    | 33.2   |
| Early Apoptotic (AV+PI-)     | 72      | 0.7     | 0.6    |

Experiment Name: Apoptosis Assay  
 Specimen Name: 180719  
 Tube Name: TNF  
 Record Date: Jul 18, 2019 11:06:01 AM  
 \$OP: User

| Population                   | #Events | %Parent | FITC-A<br>Median | FITC-A<br>rSD | PI-A<br>Median | PI-A<br>rSD |
|------------------------------|---------|---------|------------------|---------------|----------------|-------------|
| All Events                   | 11,376  | ###     | 69               | 81            | 457            | 619         |
| Cells                        | 10,000  | 87.9    | 81               | 85            | 610            | 777         |
| Q1                           | 4,795   | 47.9    | 71               | 74            | 1,070          | 609         |
| Late Apop/ Necrotic (AV+PI+) | 1,359   | 13.6    | 578              | 274           | 953            | 436         |
| Healthy (AV-PI-)             | 3,774   | 37.7    | 62               | 52            | 68             | 59          |
| Early Apoptotic (AV+PI-)     | 72      | 0.7     | 382              | 61            | 202            | 59          |
