# Supplementary material for: Development of a novel in vitro insulin resistance model in primary human tenocytes for diabetic tendinopathy research
Source: PeerJ journal article supplement (doi:10.7717/peerj.8740), 2020-06-08
Supplement: Figure_10_raw.zip [file Figure_10_raw.zip]

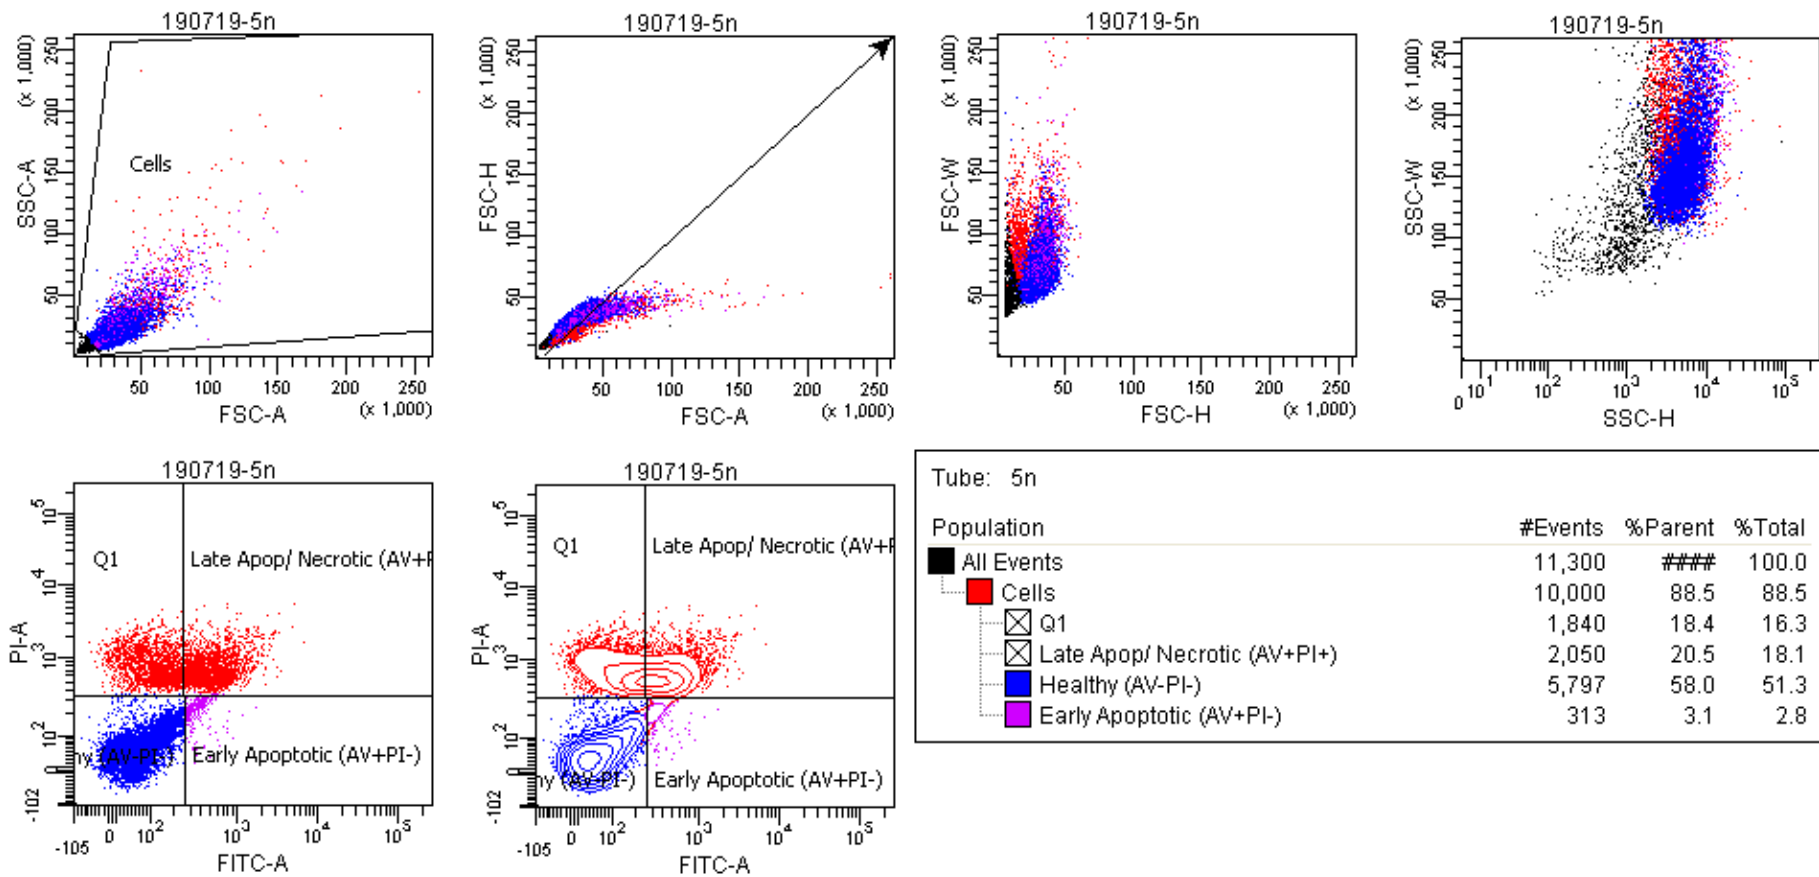

Experiment Name: Apoptosis Assay  
 Specimen Name: 190719  
 Tube Name: 5n  
 Record Date: Jul 19, 2019 1:13:34 PM  
 \$OP: User

| Population                   | #Events | %Parent | FITC-A<br>Median | FITC-A<br>rSD | PI-A<br>Median | PI-A<br>rSD |
|------------------------------|---------|---------|------------------|---------------|----------------|-------------|
| All Events                   | 11,300  | ###     | 87               | 99            | 96             | 142         |
| Cells                        | 10,000  | 88.5    | 93               | 102           | 103            | 149         |
| Q1                           | 1,840   | 18.4    | 119              | 88            | 749            | 359         |
| Late Apop/ Necrotic (AV+PI+) | 2,050   | 20.5    | 485              | 241           | 635            | 228         |
| Healthy (AV-PI-)             | 5,797   | 58.0    | 54               | 49            | 44             | 43          |
| Early Apoptotic (AV+PI-)     | 313     | 3.1     | 345              | 84            | 216            | 66          |
