# Supplementary material for: Development of a novel in vitro insulin resistance model in primary human tenocytes for diabetic tendinopathy research
Source: PeerJ journal article supplement (doi:10.7717/peerj.8740), 2020-06-08
Supplement: Figure_10_raw.zip [file Figure_10_raw.zip]

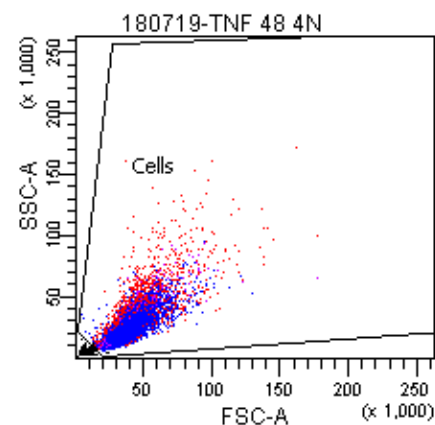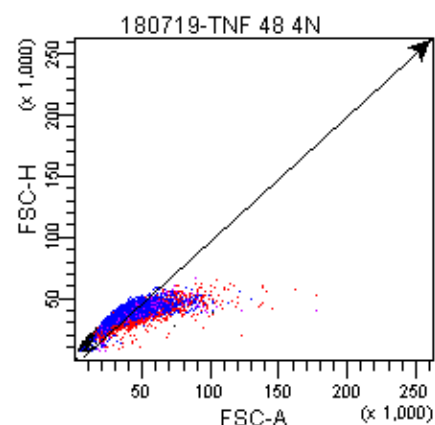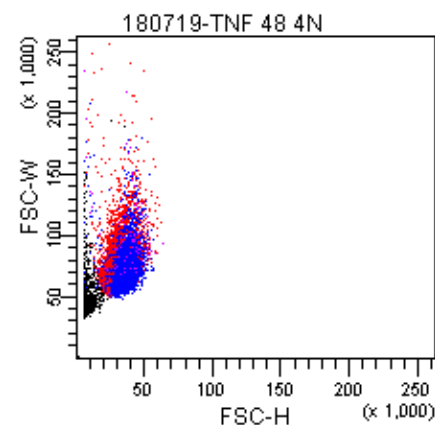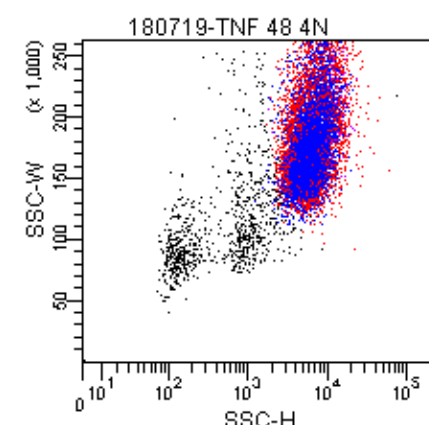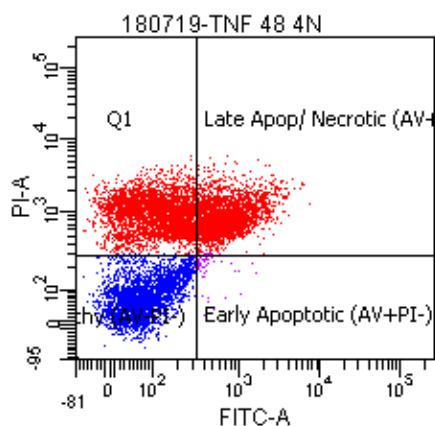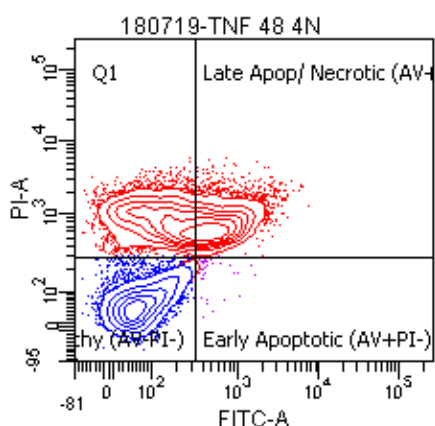

Tube: TNF 48 4N

| Population                   | #Events | %Parent | %Total |
|------------------------------|---------|---------|--------|
| All Events                   | 10,937  | ###     | 100.0  |
| Cells                        | 10,000  | 91.4    | 91.4   |
| Q1                           | 3,821   | 38.2    | 34.9   |
| Late Apop/ Necrotic (AV+PI+) | 3,123   | 31.2    | 28.6   |
| Healthy (AV-PI-)             | 2,969   | 29.7    | 27.1   |
| Early Apoptotic (AV+PI-)     | 87      | 0.9     | 0.8    |

Experiment Name: Apoptosis Assay  
 Specimen Name: 180719  
 Tube Name: TNF 48 4N  
 Record Date: Jul 18, 2019 11:12:12 AM  
 \$OP: User

| Population                   | #Events | %Parent | FITC-A<br>Median | FITC-A<br>rSD | PI-A<br>Median | PI-A<br>rSD |
|------------------------------|---------|---------|------------------|---------------|----------------|-------------|
| All Events                   | 10,937  | ###     | 147              | 176           | 563            | 681         |
| Cells                        | 10,000  | 91.4    | 168              | 186           | 610            | 650         |
| Q1                           | 3,821   | 38.2    | 125              | 110           | 897            | 469         |
| Late Apop/ Necrotic (AV+PI+) | 3,123   | 31.2    | 627              | 321           | 744            | 306         |
| Healthy (AV-PI-)             | 2,969   | 29.7    | 70               | 59            | 64             | 55          |
| Early Apoptotic (AV+PI-)     | 87      | 0.9     | 382              | 66            | 215            | 46          |
