# Supplementary material for: Development of a novel in vitro insulin resistance model in primary human tenocytes for diabetic tendinopathy research
Source: PeerJ journal article supplement (doi:10.7717/peerj.8740), 2020-06-08
Supplement: Figure_10_raw.zip [file Figure_10_raw.zip]

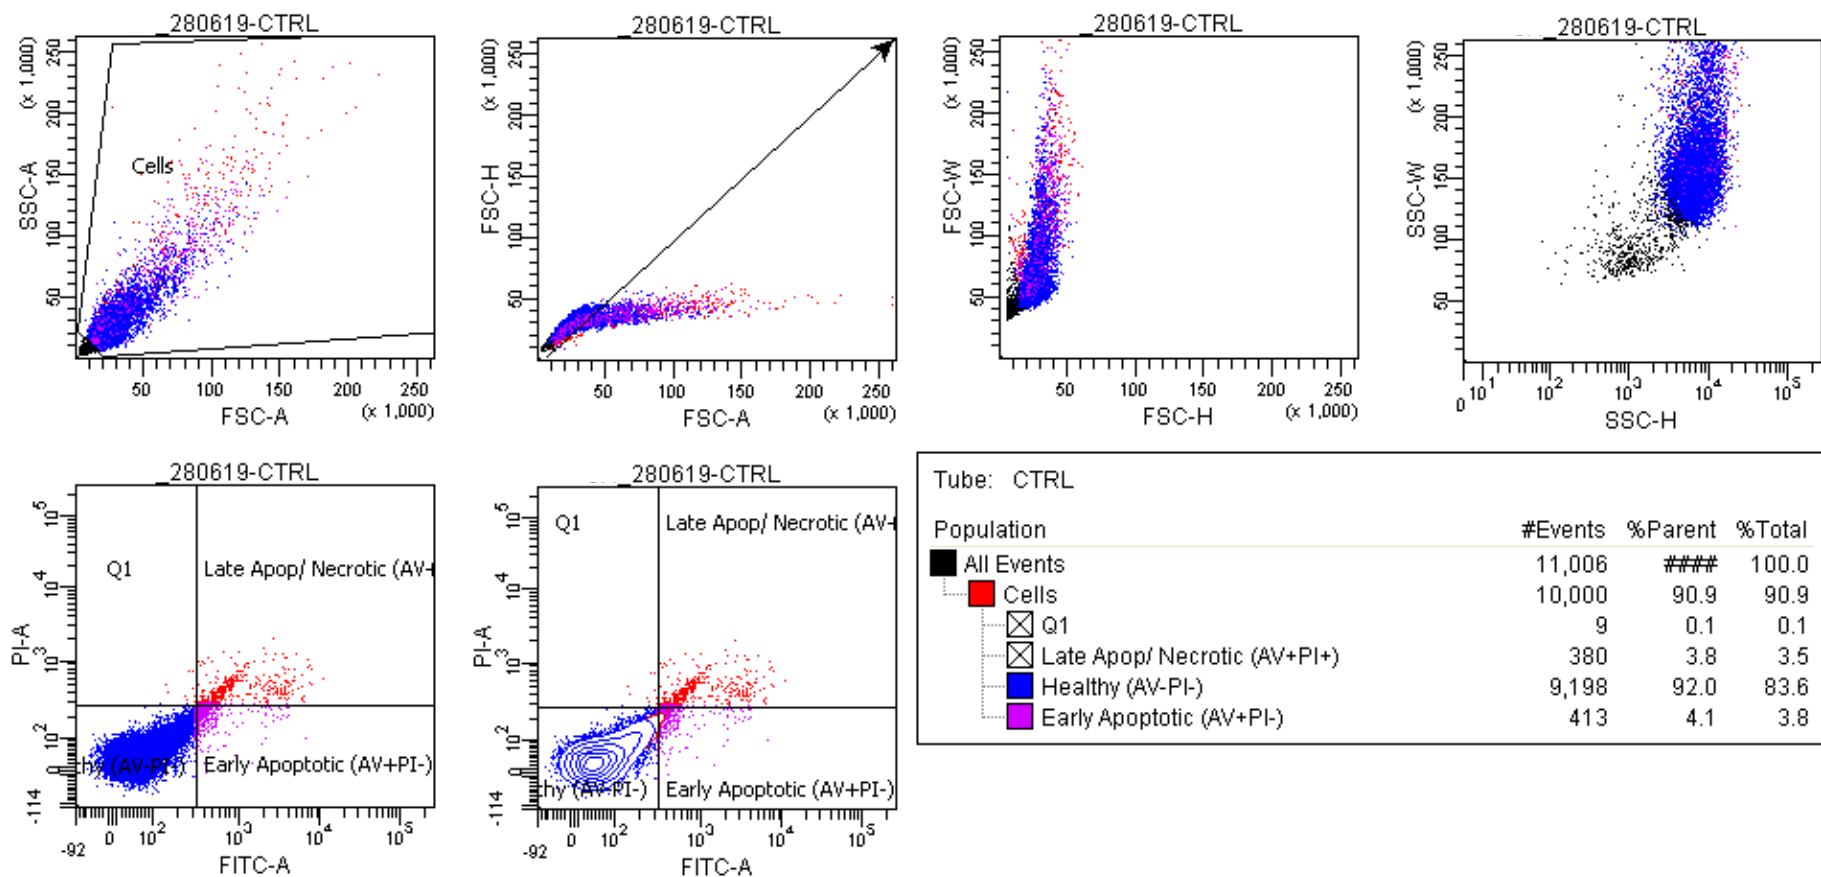

Experiment Name: Apoptosis Assay  
 Specimen Name: 280619  
 Tube Name: CTRL  
 Record Date: Jun 28, 2019 1:33:09 PM  
 \$OP: User

| Population                   | #Events | %Parent | FITC-A<br>Median | FITC-A<br>rSD | PI-A<br>Median | PI-A<br>rSD |
|------------------------------|---------|---------|------------------|---------------|----------------|-------------|
| All Events                   | 11,006  | ###     | 63               | 59            | 37             | 43          |
| Cells                        | 10,000  | 90.9    | 68               | 60            | 41             | 44          |
| Q1                           | 9       | 0.1     | 269              | 56            | 376            | 121         |
| Late Apop/ Necrotic (AV+PI+) | 380     | 3.8     | 775              | 409           | 400            | 123         |
| Healthy (AV-PI-)             | 9,198   | 92.0    | 63               | 52            | 37             | 39          |
| Early Apoptotic (AV+PI-)     | 413     | 4.1     | 417              | 101           | 201            | 66          |
