# Supplementary material for: Development of a novel in vitro insulin resistance model in primary human tenocytes for diabetic tendinopathy research
Source: PeerJ journal article supplement (doi:10.7717/peerj.8740), 2020-06-08
Supplement: Figure_10_raw.zip [file Figure_10_raw.zip]

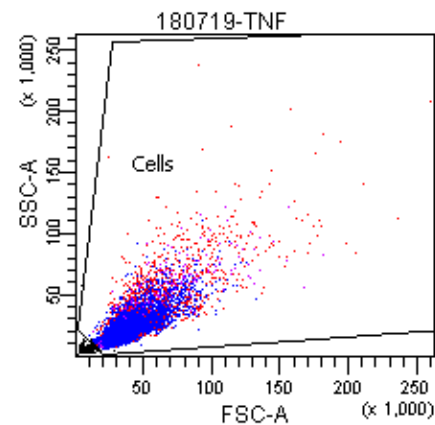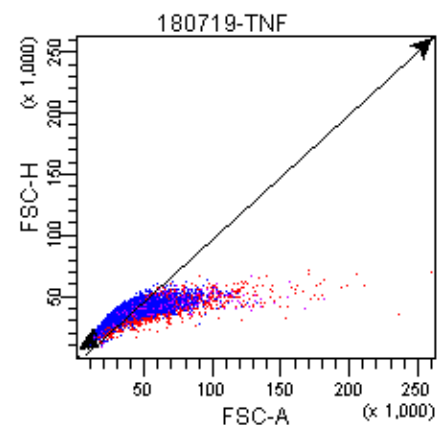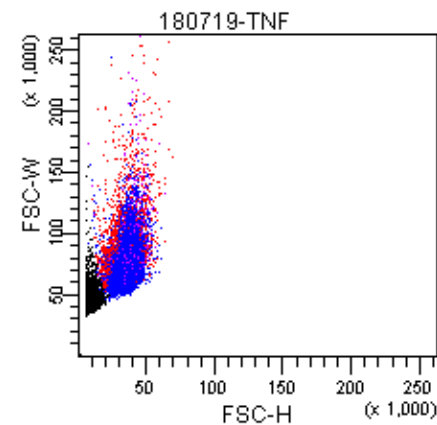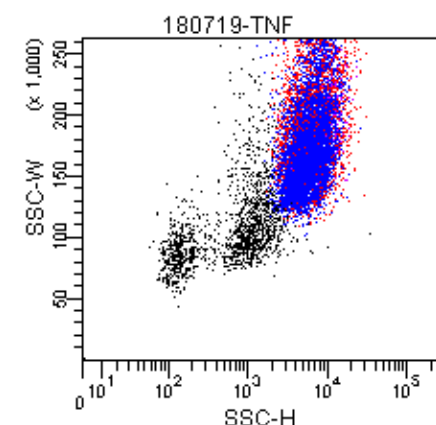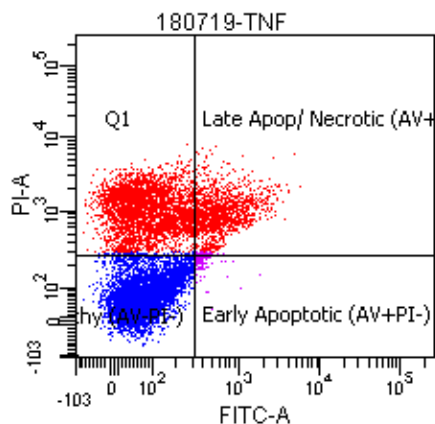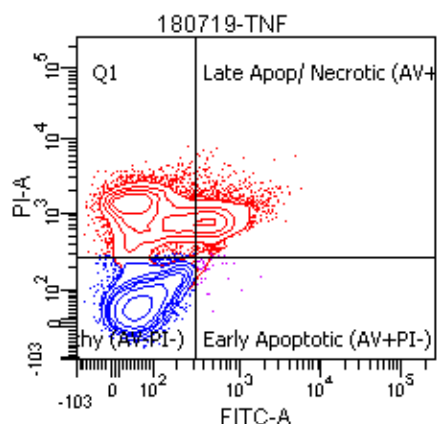

Tube: TNF

| Population                   | #Events | %Parent | %Total |
|------------------------------|---------|---------|--------|
| All Events                   | 11,517  | ###     | 100.0  |
| Cells                        | 10,000  | 86.8    | 86.8   |
| Q1                           | 3,369   | 33.7    | 29.3   |
| Late Apop/ Necrotic (AV+PI+) | 1,465   | 14.6    | 12.7   |
| Healthy (AV-PI-)             | 5,018   | 50.2    | 43.6   |
| Early Apoptotic (AV+PI-)     | 148     | 1.5     | 1.3    |

Experiment Name: Apoptosis Assay  
 Specimen Name: 180719  
 Tube Name: TNF  
 Record Date: Jul 18, 2019 11:10:12 AM  
 \$OP: User

| Population                   | #Events | %Parent | FITC-A<br>Median | FITC-A<br>rSD | PI-A<br>Median | PI-A<br>rSD |
|------------------------------|---------|---------|------------------|---------------|----------------|-------------|
| All Events                   | 11,517  | ###     | 75               | 87            | 150            | 214         |
| Cells                        | 10,000  | 86.8    | 90               | 93            | 242            | 340         |
| Q1                           | 3,369   | 33.7    | 77               | 83            | 980            | 633         |
| Late Apop/ Necrotic (AV+PI+) | 1,465   | 14.6    | 593              | 282           | 868            | 378         |
| Healthy (AV-PI-)             | 5,018   | 50.2    | 70               | 57            | 62             | 56          |
| Early Apoptotic (AV+PI-)     | 148     | 1.5     | 380              | 58            | 224            | 43          |
