# Supplementary material for: Development of a novel in vitro insulin resistance model in primary human tenocytes for diabetic tendinopathy research
Source: PeerJ journal article supplement (doi:10.7717/peerj.8740), 2020-06-08
Supplement: Figure_10_raw.zip [file Figure_10_raw.zip]

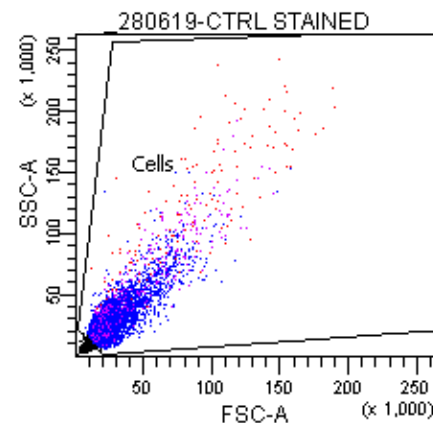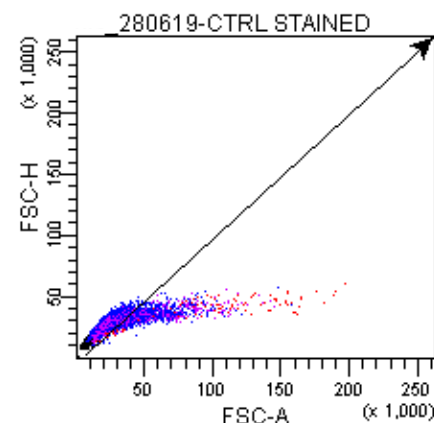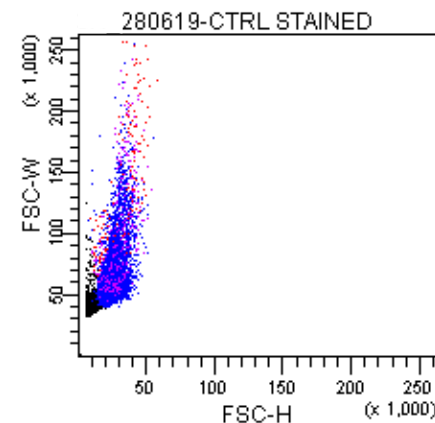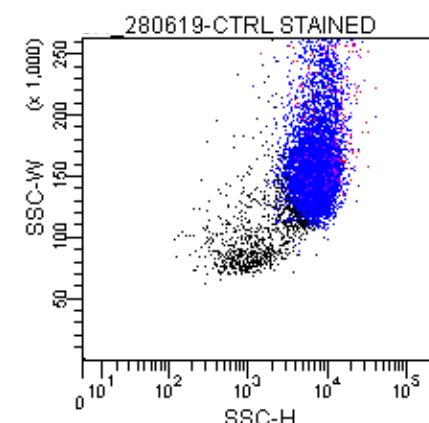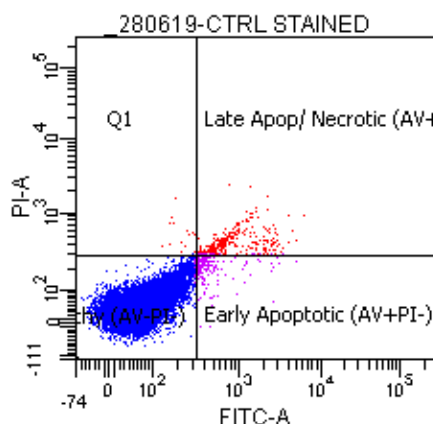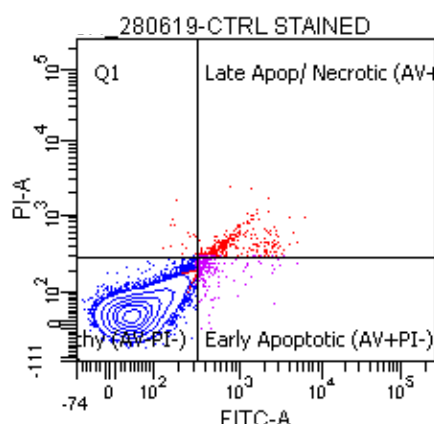

Tube: CTRL STAINED

| Population                   | #Events | %Parent | %Total |
|------------------------------|---------|---------|--------|
| All Events                   | 11,449  | ###     | 100.0  |
| Cells                        | 10,000  | 87.3    | 87.3   |
| Q1                           | 14      | 0.1     | 0.1    |
| Late Apop/ Necrotic (AV+PI+) | 268     | 2.7     | 2.3    |
| Healthy (AV-PI-)             | 9,443   | 94.4    | 82.5   |
| Early Apoptotic (AV+PI-)     | 275     | 2.8     | 2.4    |

Experiment Name: Apoptosis Assay  
 Specimen Name: 280619  
 Tube Name: CTRL STAINED  
 Record Date: Jun 28, 2019 12:44:23 PM  
 \$OP: User

| Population                   | #Events | %Parent | FITC-A<br>Median | FITC-A<br>rSD | PI-A<br>Median | PI-A<br>rSD |
|------------------------------|---------|---------|------------------|---------------|----------------|-------------|
| All Events                   | 11,449  | ###     | 54               | 51            | 34             | 41          |
| Cells                        | 10,000  | 87.3    | 60               | 51            | 38             | 42          |
| Q1                           | 14      | 0.1     | 223              | 74            | 496            | 213         |
| Late Apop/ Necrotic (AV+PI+) | 268     | 2.7     | 765              | 401           | 379            | 101         |
| Healthy (AV-PI-)             | 9,443   | 94.4    | 57               | 46            | 36             | 38          |
| Early Apoptotic (AV+PI-)     | 275     | 2.8     | 397              | 83            | 210            | 52          |
