# Supplementary material for: Development of a novel in vitro insulin resistance model in primary human tenocytes for diabetic tendinopathy research
Source: PeerJ journal article supplement (doi:10.7717/peerj.8740), 2020-06-08
Supplement: Figure_10_raw.zip [file Figure_10_raw.zip]

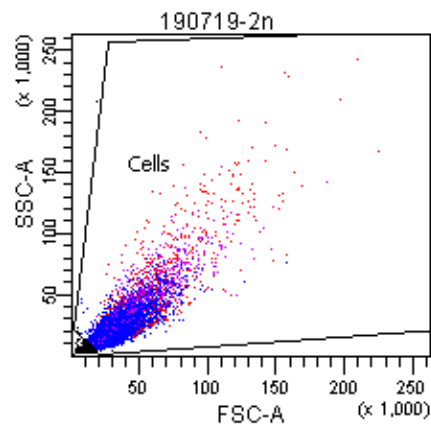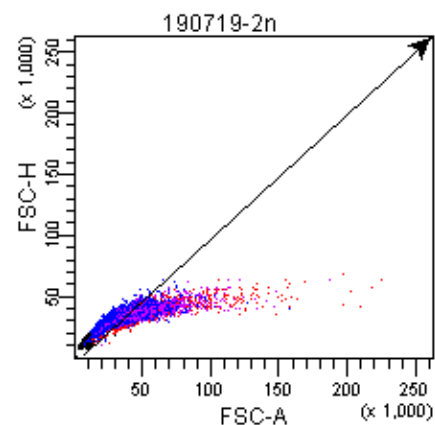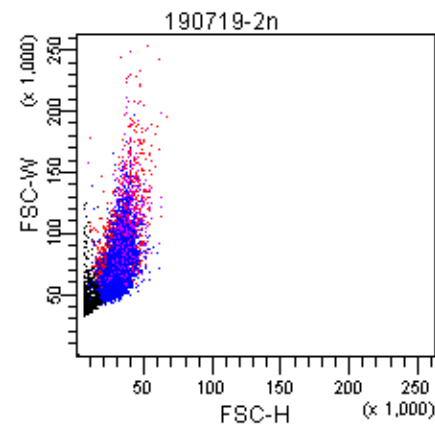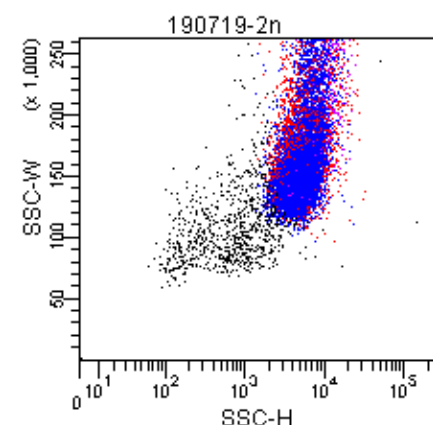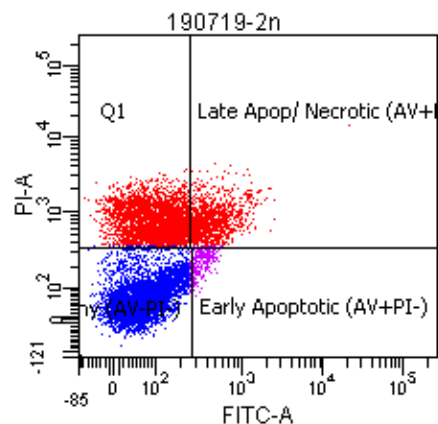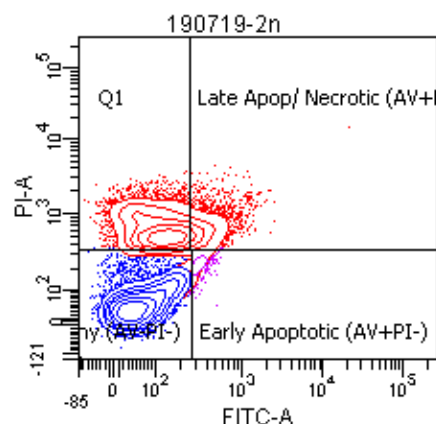

Tube: 2n

| Population                   | #Events | %Parent | %Total |
|------------------------------|---------|---------|--------|
| All Events                   | 11,082  | ###     | 100.0  |
| Cells                        | 10,000  | 90.2    | 90.2   |
| Q1                           | 3,620   | 36.2    | 32.7   |
| Late Apop/ Necrotic (AV+PI+) | 1,291   | 12.9    | 11.6   |
| Healthy (AV-PI-)             | 4,773   | 47.7    | 43.1   |
| Early Apoptotic (AV+PI-)     | 316     | 3.2     | 2.9    |

Experiment Name: Apoptosis Assay  
 Specimen Name: 190719  
 Tube Name: 2n  
 Record Date: Jul 19, 2019 1:03:25 PM  
 \$OP: User

| Population                   | #Events | %Parent | FITC-A<br>Median | FITC-A<br>rSD | PI-A<br>Median | PI-A<br>rSD |
|------------------------------|---------|---------|------------------|---------------|----------------|-------------|
| All Events                   | 11,082  | ###     | 84               | 90            | 201            | 294         |
| Cells                        | 10,000  | 90.2    | 93               | 92            | 315            | 396         |
| Q1                           | 3,620   | 36.2    | 105              | 76            | 601            | 252         |
| Late Apop/ Necrotic (AV+PI+) | 1,291   | 12.9    | 396              | 171           | 654            | 271         |
| Healthy (AV-PI-)             | 4,773   | 47.7    | 57               | 53            | 50             | 49          |
| Early Apoptotic (AV+PI-)     | 316     | 3.2     | 329              | 76            | 221            | 78          |
