# Supplementary material for: Development of a novel in vitro insulin resistance model in primary human tenocytes for diabetic tendinopathy research
Source: PeerJ journal article supplement (doi:10.7717/peerj.8740), 2020-06-08
Supplement: Figure_10_raw.zip [file Figure_10_raw.zip]

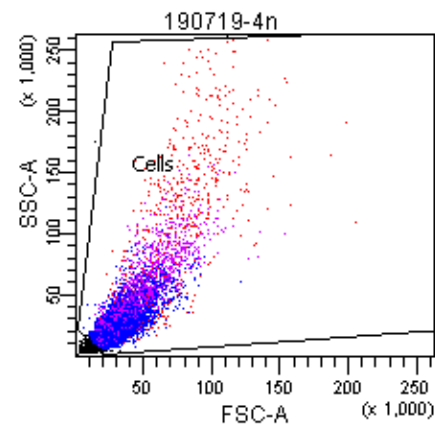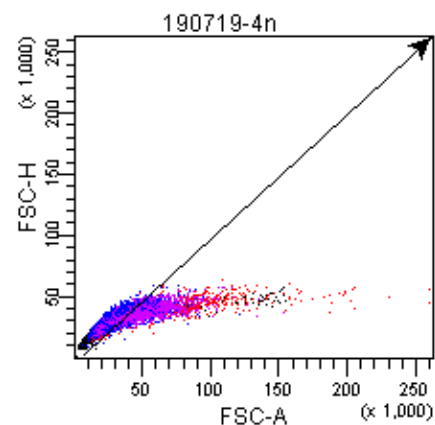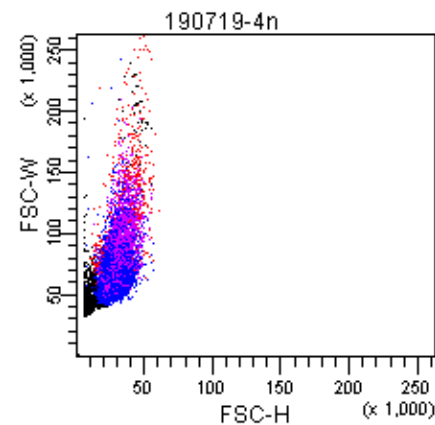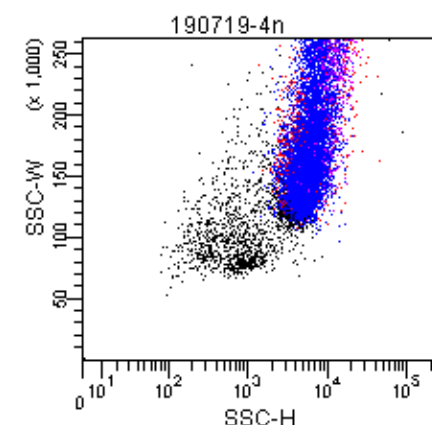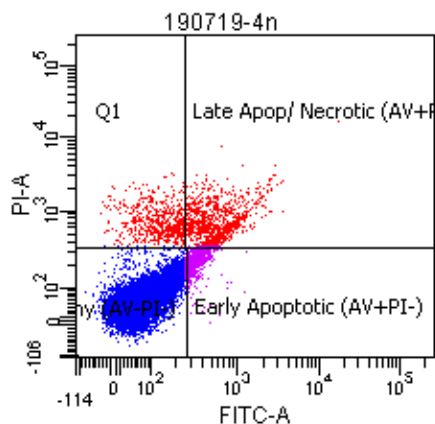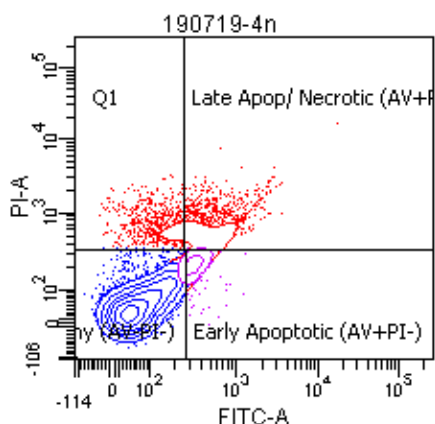

Tube: 4n

| Population                   | #Events | %Parent | %Total |
|------------------------------|---------|---------|--------|
| All Events                   | 11,858  | ###     | 100.0  |
| Cells                        | 10,000  | 84.3    | 84.3   |
| Q1                           | 587     | 5.9     | 5.0    |
| Late Apop/ Necrotic (AV+PI+) | 1,066   | 10.7    | 9.0    |
| Healthy (AV-PI-)             | 7,600   | 76.0    | 64.1   |
| Early Apoptotic (AV+PI-)     | 747     | 7.5     | 6.3    |

Experiment Name: Apoptosis Assay  
 Specimen Name: 190719  
 Tube Name: 4n  
 Record Date: Jul 19, 2019 1:12:06 PM  
 \$OP: User

| Population                   | #Events | %Parent | FITC-A<br>Median | FITC-A<br>rSD | PI-A<br>Median | PI-A<br>rSD |
|------------------------------|---------|---------|------------------|---------------|----------------|-------------|
| All Events                   | 11,858  | ###     | 70               | 81            | 54             | 69          |
| Cells                        | 10,000  | 84.3    | 85               | 87            | 66             | 78          |
| Q1                           | 587     | 5.9     | 129              | 83            | 645            | 256         |
| Late Apop/ Necrotic (AV+PI+) | 1,066   | 10.7    | 552              | 280           | 616            | 258         |
| Healthy (AV-PI-)             | 7,600   | 76.0    | 63               | 56            | 45             | 47          |
| Early Apoptotic (AV+PI-)     | 747     | 7.5     | 343              | 76            | 225            | 68          |
