# Supplementary material for: Development of a novel in vitro insulin resistance model in primary human tenocytes for diabetic tendinopathy research
Source: PeerJ journal article supplement (doi:10.7717/peerj.8740), 2020-06-08
Supplement: Figure_10_raw.zip [file Figure_10_raw.zip]

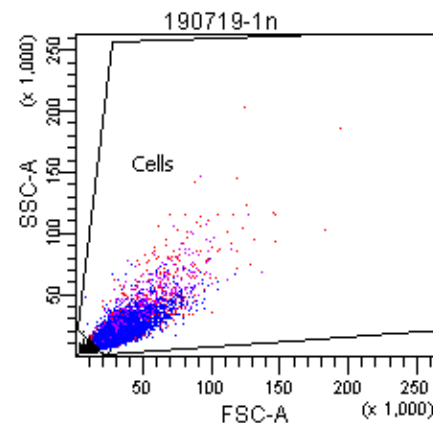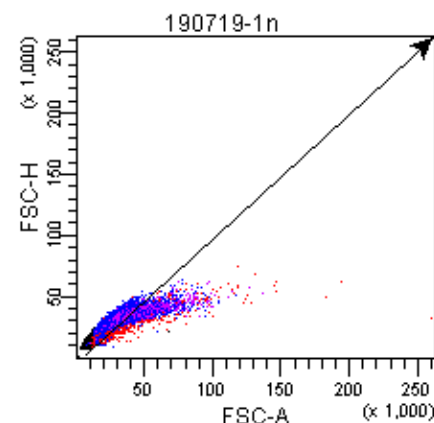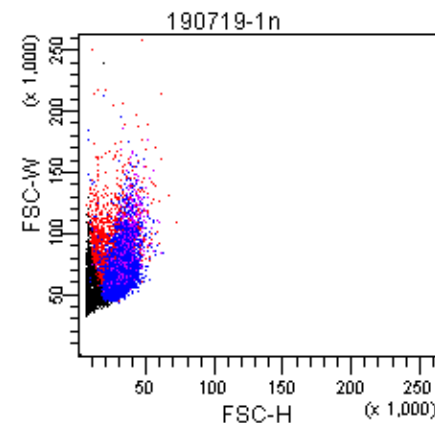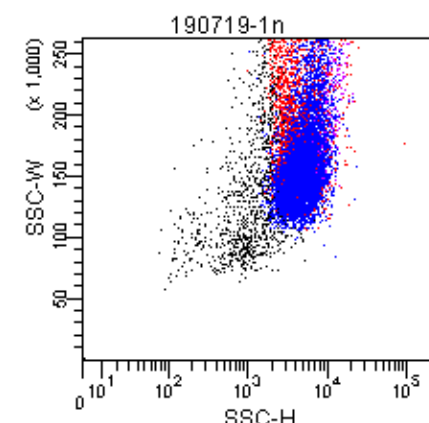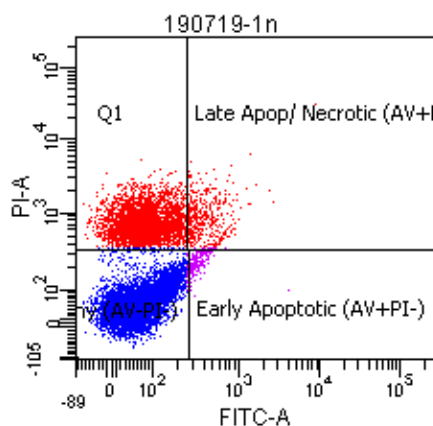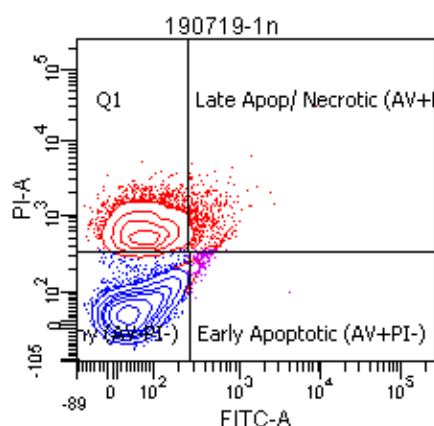

Tube: 1n

| Population                   | #Events | %Parent | %Total |
|------------------------------|---------|---------|--------|
| All Events                   | 11,245  | ###     | 100.0  |
| Cells                        | 10,000  | 88.9    | 88.9   |
| Q1                           | 3,277   | 32.8    | 29.1   |
| Late Apop/ Necrotic (AV+PI+) | 449     | 4.5     | 4.0    |
| Healthy (AV-PI-)             | 6,033   | 60.3    | 53.7   |
| Early Apoptotic (AV+PI-)     | 241     | 2.4     | 2.1    |

Experiment Name: Apoptosis Assay  
 Specimen Name: 190719  
 Tube Name: 1n  
 Record Date: Jul 19, 2019 1:16:57 PM  
 \$OP: User

| Population                   | #Events | %Parent | FITC-A<br>Median | FITC-A<br>rSD | PI-A<br>Median | PI-A<br>rSD |
|------------------------------|---------|---------|------------------|---------------|----------------|-------------|
| All Events                   | 11,245  | ###     | 58               | 61            | 91             | 134         |
| Cells                        | 10,000  | 88.9    | 64               | 63            | 94             | 134         |
| Q1                           | 3,277   | 32.8    | 75               | 62            | 634            | 264         |
| Late Apop/ Necrotic (AV+PI+) | 449     | 4.5     | 367              | 136           | 762            | 412         |
| Healthy (AV-PI-)             | 6,033   | 60.3    | 51               | 51            | 43             | 44          |
| Early Apoptotic (AV+PI-)     | 241     | 2.4     | 322              | 62            | 218            | 69          |
